# Supplementary material for: Estimating the transfer rates of bacterial plasmids with an adapted Luria–Delbrück fluctuation analysis
Source: PubMed Central journal article supplement (PMC9352209; doi:10.1371/journal.pbio.3001732), 2022-07-25
Supplement: pbio.3001732.s001.pdf [file pbio.3001732.s001.pdf]

1 **Supplementary Information for:**

2  
3 **Full Title:**

4 Estimating the transfer rates of bacterial plasmids with an adapted Luria–Delbrück  
5 fluctuation analysis

6  
7 **Short title:**

8 Estimating plasmid conjugation rates with an adapted Luria–Delbrück approach

9  
10 Olivia Kosterlitz<sup>1,2\*</sup>, Adamaris Muñoz Tirado<sup>1</sup>, Claire Wate<sup>1</sup>, Clint Elg<sup>2,3</sup>, Ivana Bozic<sup>4</sup>, Eva  
11 M. Top<sup>2,3</sup>, Benjamin Kerr<sup>1,2\*</sup>

12  
13 **Author affiliations**

14 <sup>1</sup> Biology Department, University of Washington, Seattle, WA, USA.

15 <sup>2</sup> BEACON Center for the Study of Evolution in Action.

16 <sup>3</sup> Department of Biological Sciences and Institute for Interdisciplinary Data Sciences,  
17 University of Idaho, Moscow, ID, USA.

18 <sup>4</sup> Department of Applied Mathematics, University of Washington, Seattle, WA, USA.

19 \* e-mails: livkost@uw.edu and kerrb@uw.edu

## Section 1 : Overview of approaches to estimate conjugation rate.

### Section 1a : Overview of theoretical frameworks

In this section, we highlight three key methods for estimating conjugation rate. While outlining the theoretical frameworks, we highlight the key distinctions and theoretical assumptions of each approach. Levin *et. al.* (1) introduced a simple mathematical model describing the change in density of donors, recipients and transconjugants over time (given by dynamic variables  $D_t$ ,  $R_t$ , and  $T_t$ , respectively). In this model, each population type grows exponentially at the same growth rate  $\psi$ . In addition, the transconjugant density increases because of conjugation events both from donors to recipients and from existing transconjugants to recipients at the same conjugation rate  $\gamma$ . The recipient density decreases due to these conjugation events. The densities of these dynamic populations are described by the following differential equations (where the  $t$  subscript is dropped from the dynamic variables for notational convenience):

$$\frac{dD}{dt} = \psi D, \quad [1.1]$$

$$\frac{dR}{dt} = \psi R - \gamma DR - \gamma TR, \quad [1.2]$$

$$\frac{dT}{dt} = \psi T + \gamma DR + \gamma TR. \quad [1.3]$$

Equations [1.1]-[1.3] contains four notable assumptions. First, conjugation is described by mass-action kinetics, where conjugation events are proportional to the product of donor and recipient cell densities, which is a reasonable assumption in well-mixed liquid cultures (1). Second, the model assumes a negligible rate of plasmid loss, a process whereby a dividing plasmid-containing cell produces one plasmid-containing daughter cell and one plasmid-free daughter. These first two assumptions exist in all the conjugation rate estimates we discuss. Third, the growth rate is the same for all cell types (i.e., in the language of equations [1]-[3],  $\psi_D = \psi_R = \psi_T = \psi$ ). Fourth, the plasmid conjugation rate is the same from donors to recipients as from transconjugants to recipients (i.e., in the language of equations [1]-[3],  $\gamma_D = \gamma_T = \gamma$ ). More specifically, equations [1.1]-[1.3] are a special case of equations [1]-[3] where growth and conjugation is assumed to be homogeneous across strains.

Popular rate estimation methods solved the set of ordinary differential equations from the Levin *et. al.* model (or a variation) to find an estimate for the conjugation rate  $\gamma$ . The various methods differ by the assumptions used to find the analytical solution. Levin *et. al.* was the first to derive an estimate for the conjugation rate ( $\gamma$ ) by making three additional simplifying assumptions. First, the change in cell density of donors due to growth is assumed to be negligible (i.e.,  $dD/dt \approx 0$ ). Likewise, the change in cell density of recipients due to growth and to conjugation (i.e., transformation into transconjugants) is assumed to be negligible (i.e.,  $dR/dt \approx 0$ ). Finally, transconjugants are assumed to be rare in the population such that the increase in transconjugant cell density is primarily through plasmid conjugation from donors to recipients (i.e., in equation [1.3],  $\gamma DR \gg \psi T + \gamma TR$ ). All of these assumptions are satisfied if the cell growth rate is zero ( $\psi = 0$ ), the conjugation rate ( $\gamma$ ) is small, the system starts without transconjugants ( $T_0 = 0$ ), and the densities of donors and recipients remain much greater than the density of transconjugants for the period under consideration ( $D \gg T$  and  $R \gg T$ ). Using these simplifying assumptions, Levin *et. al.* solved for an expression of the conjugation rate in

63 terms of the density of donors, recipients, and transconjugants ( $D_{\tilde{t}}$ ,  $R_{\tilde{t}}$ , and  $T_{\tilde{t}}$ ,  
 64 respectively) after a period of incubation  $\tilde{t}$  (see the GitHub Appendix I for a few different  
 65 approaches to the derivation).

$$\gamma_D = \frac{T_{\tilde{t}}}{D_{\tilde{t}}R_{\tilde{t}}\tilde{t}} \quad [1.4]$$

66 We label the expression in equation [1.4] as the “TDR” estimate for the conjugation rate,  
 67 where the letters in this acronym come from the dynamic variables used in the estimate.  
 68 Besides the model assumptions of homogenous growth rates and conjugation rates, the  
 69 most notable assumption used in the TDR derivation is that there is little to no change in  
 70 the population densities due to growth. Thus, laboratory implementation that respects this  
 71 assumption can be difficult (see section 1b for details). Regardless, TDR is a commonly  
 72 used estimate (1–4).

73 Simonsen *et al.* derived the other most widely used estimate for conjugation rate  
 74  $\gamma$ , which importantly expands application beyond the TDR method by allowing for  
 75 population growth (5). Indeed, they allowed for the rate of population growth to change  
 76 with the level of a resource in the environment, adding a dynamic variable for the resource  
 77 concentration. In addition, the conjugation rate can also change with the resource  
 78 concentration. The authors focus on a case where both growth and conjugation rates vary  
 79 with resource concentration according to the Monod function. This choice was informed  
 80 by experimental results showing that cells enter stationary phase and conjugation ramps  
 81 down to a negligible level as resources are depleted (1). This pattern occurs for various  
 82 plasmid incompatibility groups, but not all (6). Simonsen *et al.* used this updated model  
 83 to derive an estimate for plasmid conjugation rate (see GitHub Appendix II for the  
 84 derivation).

$$\gamma_D = \psi \ln \left( 1 + \frac{T_{\tilde{t}} N_{\tilde{t}}}{R_{\tilde{t}} D_{\tilde{t}}} \right) \frac{1}{(N_{\tilde{t}} - N_0)} \quad [1.5]$$

85 We refer to equation [1.5] as the “SIM” estimate for conjugation rate throughout the  
 86 manuscript, where SIM stands for “Simonsen *et al.* Identity Method” since the  
 87 underlying model assumes that all strains are *identical* with regards to growth, and donors  
 88 and transconjugants are *identical* with regards to conjugation rate. The SIM estimate  
 89 involves measuring the density of the initial population ( $N_0$ ), and the final density of donors  
 90 ( $D_{\tilde{t}}$ ), recipients ( $R_{\tilde{t}}$ ), transconjugants ( $T_{\tilde{t}}$ ), and the total population ( $N_{\tilde{t}}$ ) after the incubation  
 91 time  $\tilde{t}$ . The SIM estimate is popular since it allows for the use of batch culture in the  
 92 laboratory (see Section 1b for details). Thus, it circumvents the constraints of the  
 93 laboratory implementation of TDR; however, the underlying model holds the same  
 94 assumptions as before: homogeneous growth rates and conjugation rates.

95 Huisman *et al.* recently updated the SIM model, further extending its application  
 96 by relaxing the assumption of identical growth and transfer rates for all strains (7).  
 97 Specifically, the authors introduced population specific growth rates for donors, recipients,  
 98 and transconjugants ( $\psi_D$ ,  $\psi_R$ , and  $\psi_T$ , respectively) and population specific conjugation  
 99 rates for donors and transconjugants ( $\gamma_D$  and  $\gamma_T$ ). Huisman *et al.* made three additional  
 100 simplifying assumptions. First, conjugation and growth rates are assumed to be constant  
 101 until resources are depleted, eliminating the additional resource concentration equation  
 102 added in the SIM approach. Second, the increase in recipients due to growth greatly  
 103 outpaces the decrease in recipients due to conjugation (i.e.,  $\psi_R R \gg \gamma_D DR + \gamma_T TR$ ). Third,  
 104 the increase in transconjugants due to growth or plasmid conjugation from donors to  
 105 recipients greatly outpaces the increase in transconjugants due to plasmid conjugation  
 106 from transconjugants to recipients (i.e.,  $\psi_T T + \gamma_D DR \gg \gamma_T TR$ ). These model conditions  
 107 are reasonable if the system starts with donors and recipients present but transconjugants

108 are absent, the system is tracked for a short period of time  $\tilde{t}$ , conjugation rates are low  
 109 relative to growth rates, and the transconjugant conjugation rate ( $\gamma_T$ ) is not much higher  
 110 than the donor conjugation rate ( $\gamma_D$ ). With these added assumptions, equations [1.1]-[1.3]  
 111 can be reformulated as the following *approximate* system of equations:

$$\frac{dD}{dt} = \psi_D D, \quad [1.6]$$

$$\frac{dR}{dt} = \psi_R R, \quad [1.7]$$

$$\frac{dT}{dt} = \psi_T T + \gamma_D D R, \quad [1.8]$$

112 Huisman *et. al.* used these equations to derive an estimate for the donor conjugation rate

$$\gamma_D = (\psi_D + \psi_R - \psi_T) \frac{T_{\tilde{t}}}{(D_{\tilde{t}} R_{\tilde{t}} - D_0 R_0 e^{\psi_T \tilde{t}})}, \quad [1.9]$$

113 where different cell types now can have different growth rates (see GitHub Appendix III  
 114 for the derivation). We term equation [1.9] as the ASM estimate for donor conjugation  
 115 rate, where ASM stands for “Approximate Simonsen *et. al.* Method”.

116 For all methods (TDR, SIM, ASM, and LDM), we summarize model variables and  
 117 parameters in Table A. In addition, all variables used in the conjugation estimates are in  
 118 Table B. Lastly, all assumptions underlying each estimate are in Table C.

**Table A: Variables and parameters used in plasmid dynamic models.**

| Variable/<br>Parameter | Description                                | Relevant<br>Estimate(s) | Units                                          |
|------------------------|--------------------------------------------|-------------------------|------------------------------------------------|
| $D$                    | Donor density                              | TDR, SIM,<br>ASM, LDM   | $\frac{\text{cfu}}{\text{ml}}$                 |
| $R$                    | Recipient density                          | TDR, SIM,<br>ASM, LDM   |                                                |
| $T$                    | Transconjugant density                     | TDR, SIM,<br>ASM, LDM   |                                                |
| $\psi$                 | Growth rate (not population specific)      | TDR, SIM                | $\frac{1}{\text{hr}}$                          |
| $\psi_D$               | Donor growth rate                          | ASM, LDM                |                                                |
| $\psi_R$               | Recipient growth rate                      | ASM, LDM                |                                                |
| $\psi_T$               | Transconjugant growth rate                 | ASM, LDM                |                                                |
| $\gamma$               | Conjugation rate (not population specific) | TDR, SIM                | $\frac{\text{ml}}{\text{cfu} \cdot \text{hr}}$ |
| $\gamma_D$             | Donor-recipient conjugation rate           | ASM, LDM                |                                                |
| $\gamma_T$             | Transconjugant-recipient conjugation rate  | ASM, LDM                |                                                |

**Table B: Variables and parameters used to estimate\* conjugation rate**

| Variable/Parameter | Description                              | Relevant Estimate       | Units |
|--------------------|------------------------------------------|-------------------------|-------|
| $\tilde{t}$        | Incubation time (final<br>sampling time) | TDR, SIM**, ASM,<br>LDM | hr    |

|                                                                                                                                                                                                                               |                                                 |                    |                                |
|-------------------------------------------------------------------------------------------------------------------------------------------------------------------------------------------------------------------------------|-------------------------------------------------|--------------------|--------------------------------|
| $D_0, R_0$                                                                                                                                                                                                                    | Initial donor and recipient densities           | ASM, LDM           | $\frac{\text{cfu}}{\text{ml}}$ |
| $D_{\tilde{t}}, R_{\tilde{t}}$                                                                                                                                                                                                | Final donor and recipient densities             | TDR, SIM, ASM, LDM |                                |
| $T_{\tilde{t}}$                                                                                                                                                                                                               | Final transconjugant density                    | TDR, SIM, ASM      |                                |
| $N_0, N_{\tilde{t}}$                                                                                                                                                                                                          | Initial and final total population density      | SIM                |                                |
| $\psi_T$                                                                                                                                                                                                                      | Transconjugant growth rate                      | ASM                | $\text{hr}^{-1}$               |
| $p_0(\tilde{t})$                                                                                                                                                                                                              | Probability a population has no transconjugants | LDM                |                                |
| * The laboratory estimates are used here (see Section 1b)                                                                                                                                                                     |                                                 |                    |                                |
| ** If the SIM assay is conducted on exponentially growing cultures (see Section 1c) $\tilde{t}$ along with $N_0$ and $N_{\tilde{t}}$ can be used to estimate $\psi$ (otherwise, an independent estimate of $\psi$ is needed). |                                                 |                    |                                |

**Table C: Summary of modeling assumptions.**

| Assumption                                                                                                                                                                                                          | TDR | SIM | ASM | LDM |
|---------------------------------------------------------------------------------------------------------------------------------------------------------------------------------------------------------------------|-----|-----|-----|-----|
| Conjugation events follow mass-action kinetics                                                                                                                                                                      | X   | X   | X   | X   |
| The plasmid loss rate of the focal plasmid is zero                                                                                                                                                                  | X   | X   | X   | X   |
| The cell populations do not change in size due to growth                                                                                                                                                            | X   |     |     |     |
| Processes of conjugation and growth are not resource dependent*                                                                                                                                                     | X   |     | X   | X   |
| The cell populations grow exponentially (i.e., constant growth rate)                                                                                                                                                |     |     | X   | X   |
| The growth rate is identical for all cell types                                                                                                                                                                     | X   | X   |     |     |
| The transconjugant conjugation rate is not high relative to the donor conjugation rate                                                                                                                              | X   | X   | X   |     |
| * The SIM model can incorporate resource-dependent growth and conjugation if (1) growth and transfer rates are homogeneous and (2) the functional form for resource dependence is the same for growth and transfer. |     |     |     |     |

119  
120  
121  
122  
123  
124  
125  
126

*Section 1b : Alternative laboratory forms for conjugation estimates*

Often the conjugation estimates can be re-written into a form of the equation that is more amenable to laboratory implementation. Here we walk through rearranging the equations for a subset of the estimates.

For the SIM estimate, we start with equation [1.5]. If the entire period from  $t = 0$  to  $t = \tilde{t}$  involves exponential growth, then  $N_{\tilde{t}} = N_0 e^{\psi \tilde{t}}$ . In such a case,  $\psi = (1/\tilde{t}) \ln(N_{\tilde{t}}/N_0)$ . We arrive at the alternative laboratory form for SIM

$$\gamma = \frac{1}{\tilde{t}} \left[ \ln \left( 1 + \frac{T_{\tilde{t}} N_{\tilde{t}}}{R_{\tilde{t}} D_{\tilde{t}}} \right) \right] \frac{\ln N_{\tilde{t}} - \ln N_0}{N_{\tilde{t}} - N_0}. \quad [1.10]$$

127  
128  
129

We note that equation [1.10] is appropriate for some “truncated” versions of the SIM approach, but not generally applicable to the standard overnight version in which the culture does not grow exponentially across the entire assay.

130 To rearrange the ASM estimate, we start with equation [1.9]. While the equations  
 131  $\psi_D = (1/\tilde{t}) \ln(D_{\tilde{t}}/D_0)$  and  $\psi_R = (1/\tilde{t}) \ln(R_{\tilde{t}}/R_0)$  again provide estimates on donor and  
 132 recipient growth rates, we cannot express the transconjugant growth rate ( $\psi_T$ ) as a simple  
 133 expression of time and initial/final densities of members of the mating culture. However,  
 134 data from a transconjugant monoculture supply an estimate for this parameter. Thus, we  
 135 arrive at the laboratory form for ASM

$$\gamma_D = \left\{ \frac{1}{\tilde{t}} (\ln D_{\tilde{t}} R_{\tilde{t}} - \ln D_0 R_0) - \psi_T \right\} \frac{T_{\tilde{t}}}{(D_{\tilde{t}} R_{\tilde{t}} - D_0 R_0 e^{\psi_T \tilde{t}})}. \quad [1.11]$$

136 To rearrange the LDM estimate, we start with equation [11]. Since  $D_{\tilde{t}} = D_0 e^{\psi_D \tilde{t}}$   
 137 and  $R_{\tilde{t}} = R_0 e^{\psi_R \tilde{t}}$ , it is the case that  $\psi_D = (1/\tilde{t}) \ln(D_{\tilde{t}}/D_0)$  and  $\psi_R = (1/\tilde{t}) \ln(R_{\tilde{t}}/R_0)$ . So,  
 138 we have

$$139 \quad \gamma_D = \frac{1}{\tilde{t}} \ln p_0(\tilde{t}) \frac{\ln\left(\frac{D_{\tilde{t}}}{D_0}\right) + \ln\left(\frac{R_{\tilde{t}}}{R_0}\right)}{D_0 R_0 - D_{\tilde{t}} R_{\tilde{t}}}$$

140 After rearrangement, we have

$$141 \quad \gamma_D = \frac{1}{\tilde{t}} \{-\ln p_0(\tilde{t})\} \frac{\ln(D_{\tilde{t}} R_{\tilde{t}}) - \ln(D_0 R_0)}{D_{\tilde{t}} R_{\tilde{t}} - D_0 R_0}.$$

142 In the laboratory, we measure an estimate ( $\hat{p}_0(\tilde{t})$ ) of the probability that a population has  
 143 no transconjugants ( $p_0(\tilde{t})$ ) which is simply the fraction of the populations (i.e., parallel  
 144 cultures) that have no transconjugants at the incubation time  $\tilde{t}$ . In addition, if a 1 ml  
 145 volume is not used for each mating culture (assuming that all cell densities are measured  
 146 in cfu/ml units), then we must add a correction factor  $f$  (see Section 5 for details and an  
 147 example). Thus, we arrive at the laboratory form for the LDM, which is equation [13].

$$148 \quad \gamma_D = \frac{f}{\tilde{t}} [-\ln \hat{p}_0(\tilde{t})] \frac{\ln D_{\tilde{t}} R_{\tilde{t}} - \ln D_0 R_0}{D_{\tilde{t}} R_{\tilde{t}} - D_0 R_0}$$

### 149 Section 1c : Overview of laboratory implementations

150 In this section, we compare the laboratory implementations of the various  
 151 estimates: TDR, SIM, and ASM. Each method is explained either as recommended by its  
 152 authors or the most simplified protocol to acquire the information for the estimate. For  
 153 each, we describe proper laboratory implementation for the approaches based on the  
 154 model and derivation assumptions used to acquire the estimate. Note in this section, we  
 155 do not explore the assumptions that are violated due to the biological entities being tested  
 156 (i.e., specific species or plasmids) which can result in violations such as unequal  
 157 conjugation rates or growth rates. These are explored in the main text and Section 4 via  
 158 stochastic simulations. Thus, we focus solely on the parameters under the experimenter's  
 159 control. For ease of reference, key implementation differences are highlighted in Table D.

160 The TDR estimate has a simple form (equation [1.4]). Donors and recipients are  
 161 mixed in non-selective growth medium and incubated for a specified time  $\tilde{t}$ . Typically,  
 162 densities after the incubation time are determined using selective plating. The derivation  
 163 assumes the density in donors and recipients does not change due to growth which sets  
 164 specific constraints on the implementation of this approach. In the original study, Levin  
 165 *et. al.* used a chemostat to keep the population constant (1). Other studies shorten the  
 166 incubation time  $\tilde{t}$  such that population growth is negligible and use various laboratory  
 167 tools to detect the small number of transconjugants (3, 4).

168 The SIM estimate is not built on an assumption of unchanging population densities.  
 169 Donor and recipient populations in exponential phase are mixed in non-selective growth  
 170 medium. The initial population density ( $N_0$ ) is determined by dilution plating on non-  
 171  
 172

173 selective medium. After the mating mixture is incubated (for a period of  $\tilde{t}$ ), the final  
 174 densities ( $D_{\tilde{t}}$ ,  $R_{\tilde{t}}$ ,  $T_{\tilde{t}}$ , and  $N_{\tilde{t}}$ ) are determined by dilution plating on selective and non-  
 175 selective media. To implement SIM as written in equation [1.10] (see Section 1b), the  
 176 specified incubation time  $\tilde{t}$  must occur well before stationary phase is reached to collect  
 177 proper data for estimating the population growth rate ( $\psi = (\ln N_{\tilde{t}} - \ln N_0)/\tilde{t}$ ). There is an  
 178 alternative option for implementing the SIM using equation [1.5]. The donor and recipient  
 179 populations are mixed and incubated under batch culture conditions (specifically  
 180 exponential and stationary phase). However, the (maximum) population growth rate ( $\psi$ )  
 181 needs to be determined with two additional samplings from the mixed population at times  
 182  $t_a$  and  $t_b$ , both occurring *within exponential phase*:

$$\psi = \frac{\ln(N_{t_b}/N_{t_a})}{t_b - t_a} \quad [1.12]$$

183 The population densities  $N_{t_a}$  and  $N_{t_b}$  can be estimated either through colony counts from  
 184 plating or optical density from a spectrophotometer. Either way, the timing of exponential  
 185 phase is important for this approach and at least some analysis during this phase is  
 186 required regardless of the implementation strategy.

187 For the ASM estimate, donor and recipient populations in exponential phase are  
 188 mixed in non-selective medium. Initial densities ( $D_0$  and  $R_0$ ) are determined by plating  
 189 dilutions on the appropriate selective media. After the donor-recipient co-culture  
 190 incubates for a specified time ( $\tilde{t}$ ), final densities ( $D_{\tilde{t}}$ ,  $R_{\tilde{t}}$ , and  $T_{\tilde{t}}$ ) are determined by plating  
 191 dilutions on the appropriate selective media. From the transconjugant-selecting agar  
 192 plates, a transconjugant clone is incubated in monoculture then sampled twice (at times  
 193  $t_a$  and  $t_b$ ) in exponential phase to measure the transconjugant growth rate ( $\psi_T =$   
 194  $\ln(T_{t_b}/T_{t_a})/(t_b - t_a)$ ). The authors point out a critical consideration for proper  
 195 implementation of the ASM is the incubation time  $\tilde{t}$ . Not only is sampling in exponential  
 196 phase important, but if the incubation time  $\tilde{t}$  is too long and passes a critical time ( $t_{crit}$ )  
 197 the approximations used to derive the ASM break down. To avoid overshooting  $t_{crit}$ , the  
 198 authors recommend sampling as soon as measurable transconjugants arise. To  
 199 determine that the incubation time used was below the critical time ( $t_{crit}$ ), a second assay  
 200 is recommended by the authors to measure the transconjugant conjugation rate  $\gamma_T$ , which  
 201 will determine if the original incubation time  $\tilde{t}$  was below  $t_{crit}$  for measuring the donor  
 202 conjugation rate. This second assay would have the transconjugant clone become the  
 203 donor in the mixture, while a newly marked recipient must be used so that donors and  
 204 recipients can be distinguished using selective plating.

205 Each method has aspects of implementation in common. Each one shares the  
 206 basic approach of mixing donors and recipients over some incubation time  $\tilde{t}$ . Each  
 207 estimate requires reliable selectable markers to differentiate donors, recipients, and  
 208 transconjugants. However, all estimates have some constraints on initial densities and  
 209 time of measurement. This can occur because the experimenter needs to capture  
 210 conjugation events (all estimates require this), avoid population growth (TDR), or keep  
 211 growth exponential (ASM, and at least parts of SIM). Even so, each method has clear  
 212 distinctions. The most notable is the incubation time  $\tilde{t}$  (i.e., the end of the assay). The  
 213 TDR method is constrained to conditions where no change in population size due to  
 214 growth can occur. For SIM, initial and final sampling are not constrained to a particular  
 215 phase of growth; however, measurement of the growth rate must occur during the  
 216 exponential growth phase. For ASM, initial sampling is in early exponential phase, and  
 217 the final sampling needs to occur during a specific time window. In other words, the assay  
 218 needs to be long enough that measurable transconjugants appear, but short enough so

that assumptions are not violated (which can occur if transconjugant density becomes too large).

**Table D: Comparison of implementations.**

| Summary                                                                                                                                                                  | TDR | SIM | ASM | LDM |
|--------------------------------------------------------------------------------------------------------------------------------------------------------------------------|-----|-----|-----|-----|
| Assay conditions minimizing the change in density due to growth                                                                                                          | X   |     |     |     |
| Minimize incubation time necessary for producing transconjugants                                                                                                         |     |     | X   |     |
| An incubation time results in a subset of parallel populations having no transconjugants                                                                                 |     |     |     | X   |
| Assay occurs over a period of exponential cell growth                                                                                                                    |     | X*  | X   | X   |
| Assay requires multiple parallel mating cultures to obtain one estimate                                                                                                  |     |     |     | X   |
| Assay requires a measurement of transconjugant density                                                                                                                   | X   | X   | X   |     |
| Assay requires a measurement of population growth rate                                                                                                                   |     | X*  |     |     |
| Assay requires a measurement of transconjugant growth rate                                                                                                               |     |     | X   |     |
| * For the SIM assay, either the entire assay is conducted over exponentially growing cultures or an independent estimate for (maximum) population growth rate is needed. |     |     |     |     |

221

## Section 2 : Derivation of $p_0(\tilde{t})$ for the LDM estimate

222

223

In this section, we will continue to assume an experimental volume of 1 ml for the co-culture such that the density of cells per ml is equivalent to the cell count numerically. We will not explicitly track units in this section, but we deal with the case of an arbitrary experimental volume in Section 5.

224

225

226

227

228

We define  $p_n(t)$  to be the probability that there are  $n$  transconjugants at time  $t$ , where  $n$  is a non-negative integer (i.e.,  $p_n(t) = \Pr\{T_t = n\}$ ). We focus here on the probability that transconjugants are absent (namely, where  $n = 0$ ) and derive an expression for  $p_0(t)$ . By definition  $p_0(t + \Delta t) = \Pr\{T_{t+\Delta t} = 0\}$ . However,  $T_{t+\Delta t} = 0$  implies  $T_t = 0$ , so we can write

229

230

231

232

$$p_0(t + \Delta t) = \Pr\{(T_{t+\Delta t} = 0) \cap (T_t = 0)\} = \Pr\{T_{t+\Delta t} = 0 \mid T_t = 0\} \Pr\{T_t = 0\},$$

233

Given that  $p_0(t) = \Pr\{T_t = 0\}$ , we can use equation [9] to write the following time-increment recursion for  $p_0(t)$ :

234

235

$$p_0(t + \Delta t) = (1 - \gamma_D D_t R_t \Delta t) p_0(t).$$

236

This can be simplified as follows

237

$$\frac{p_0(t + \Delta t) - p_0(t)}{\Delta t} = -\gamma_D D_t R_t p_0(t).$$

238

Taking the limit as  $\Delta t \rightarrow 0$  gives

239

$$\lim_{\Delta t \rightarrow 0} \frac{p_0(t + \Delta t) - p_0(t)}{\Delta t} = \frac{dp_0(t)}{dt}.$$

240

Therefore, we have the following differential equation:

241

$$\frac{dp_0(t)}{dt} = -\gamma_D D_t R_t p_0(t).$$



242 We are assuming  $D_t = D_0 e^{\psi_D t}$  and  $R_t = R_0 e^{\psi_R t}$ . We note that these assumptions are  
 243 reasonable if the densities of donors and recipients are reasonably large and the rate of  
 244 transconjugant generation per recipient cell ( $\gamma_D D_t + \gamma_T T_t$ , or if  $T_t = 0$ , simply  $\gamma_D D_t$ )  
 245 remains very small relative to per capita recipient growth rate ( $\psi_R$ ). Under these  
 246 assumptions, our differential equation becomes:

$$247 \quad \frac{dp_0(t)}{dt} = -\gamma_D D_0 R_0 e^{(\psi_D + \psi_R)t} p_0(t).$$

248 We solve this differential equation via separation of variables, integrating from 0 to our  
 249 incubation time of interest  $\tilde{t}$ :

$$250 \quad \int_0^{\tilde{t}} \frac{dp_0(t)}{p_0(t)} = \int_0^{\tilde{t}} -\gamma_D D_0 R_0 e^{(\psi_D + \psi_R)t} dt,$$

$$251 \quad \ln p_0(t) \Big|_0^{\tilde{t}} = \frac{-\gamma_D D_0 R_0}{\psi_D + \psi_R} e^{(\psi_D + \psi_R)t} \Big|_0^{\tilde{t}},$$

$$252 \quad \ln p_0(\tilde{t}) - \ln p_0(0) = \frac{-\gamma_D D_0 R_0}{\psi_D + \psi_R} e^{(\psi_D + \psi_R)\tilde{t}} - \frac{-\gamma_D D_0 R_0}{\psi_D + \psi_R}.$$

253 Given that  $p_0(0) = 1$ ,

$$254 \quad \ln p_0(\tilde{t}) = \frac{-\gamma_D D_0 R_0}{\psi_D + \psi_R} (e^{(\psi_D + \psi_R)\tilde{t}} - 1),$$

$$255 \quad p_0(\tilde{t}) = \exp \left\{ \frac{-\gamma_D D_0 R_0}{\psi_D + \psi_R} (e^{(\psi_D + \psi_R)\tilde{t}} - 1) \right\},$$

256 which is equation [10].  
 257

### 258 Section 3 : Derivation of mutation rate from the Luria-Delbrück experiment

259 Here we derive the classic estimate of mutation rate from Luria and Delbrück. We assume  
 260 that there is a population of wild-type cells that grow according to the following equation:  
 261

$$N_t = N_0 e^{\psi_N t}, \quad [3.1]$$

262 where  $N_t$  is the number of wild type cells at time  $t$  and  $\psi_N$  is the per capita growth rate.  
 263 The wild-type population dynamics are assumed to be deterministic (a reasonable  
 264 assumption if the initial population size is reasonably large, i.e.,  $N_0 \gg 0$ ). We are also  
 265 ignoring the loss of wild-type cells to mutational transformation, but this omission is  
 266 reasonable if the mutation rate is very small relative to per capita wild-type growth rate.

267 Let the number of mutants be given by a random variable  $M_t$ . This variable takes  
 268 on non-negative integer values. For a very small interval of time,  $\Delta t$ , the current number  
 269 of mutants will either increase by one or remain constant. The probabilities of each  
 270 possibility are given as follows:

$$\Pr\{M_{t+\Delta t} = M_t + 1\} = \mu N_t \Delta t + \psi_M M_t \Delta t, \quad [3.2]$$

$$\Pr\{M_{t+\Delta t} = M_t\} = 1 - (\mu N_t + \psi_M M_t) \Delta t. \quad [3.3]$$

271 The two terms on the right-hand side of equation [3.2] give the ways that a mutant can be  
 272 generated. The first term measures the probability that a wild-type cell undergoes a  
 273 mutation ( $\mu$  is the mutation rate). The second term gives the probability that a mutant cell  
 274 divides and produces two mutant cells ( $\psi_M$  is the mutant growth rate). Equation [3.3] is  
 275 the probability that neither of these processes occur.

276 Analogous to the procedure in Section 2 (with  $p_0(t) = \Pr \{M_t = 0\}$ ):

277 
$$p_0(t + \Delta t) = (1 - \mu N_t \Delta t) p_0(t).$$

278 By rearranging, taking the limit as  $\Delta t \rightarrow 0$ , and utilizing equation [3.1], we have

279 
$$\frac{dp_0(t)}{dt} = -\mu N_0 e^{\psi_N t} p_0(t).$$

280 This differential equation can be solved in an analogous way as well

281 
$$\int_0^{\tilde{t}} \frac{dp_0(t)}{p_0(t)} = \int_0^{\tilde{t}} -\mu N_0 e^{\psi_N t} dt,$$

282 
$$\ln p_0(t) \Big|_0^{\tilde{t}} = \frac{-\mu N_0}{\psi_N} e^{\psi_N t} \Big|_0^{\tilde{t}},$$

283 
$$\ln p_0(\tilde{t}) - \ln p_0(0) = \frac{-\mu N_0}{\psi_N} e^{\psi_N \tilde{t}} - \frac{-\mu N_0}{\psi_N}.$$

284 Because we assume  $M_0 = 0$ , we must have  $p_0(0) = 1$ , and

285 
$$\ln p_0(\tilde{t}) = \frac{-\mu N_0}{\psi_N} (e^{\psi_N \tilde{t}} - 1).$$

286 Solving for the mutation rate  $\mu$

287 
$$\mu = -\ln p_0(\tilde{t}) \frac{\psi_N}{N_0 (e^{\psi_N \tilde{t}} - 1)},$$

288 which is equation [12]. This equation can also be expressed as:

289 
$$\mu = -\ln p_0(\tilde{t}) \frac{\psi_N}{N_{\tilde{t}} - N_0}.$$

290 To recover Luria and Delbrück's original formulation, consider a new time variable  
291  $z$  defined as follows:

292 
$$z = \frac{t}{t_d / \ln 2},$$

293 where  $t_d$  is the period required for population doubling during exponential growth.  
294 Because

295 
$$N_0 e^{\psi_N t} = N_0 2^{t/t_d},$$

296 it is the case that

297 
$$\psi_N = \frac{1}{t_d / \ln 2}.$$

298 Therefore,  $z = \psi_N t$  and the equation  $N_t = N_0 e^{\psi_N t}$  can be expressed as

299 
$$N_z = N_0 e^z$$

300 Performing the same analysis on this new equation gives the original formulation (their  
301 equations [4] and [5], where our  $\mu$  is given by their "a" and our  $\tilde{z}$  is given by their "t"):

302 
$$\mu = \frac{-\ln p_0(\tilde{z})}{N_{\tilde{z}} - N_0}.$$

303

## 304 Section 4 : Extended Simulation Results

### 305 Section 4a : Extended stochastic simulation methods

306

307 To systematically explore the effects of heterogeneous growth and conjugation  
308 rates (as well as non-zero rates of plasmid loss) on the accuracy and precision of  
309 estimating the donor conjugation rate ( $\gamma_D$ ), we developed a stochastic simulation  
310 framework using the Gillespie algorithm. We ran sets of simulations sweeping through  
311 parameter values. Each simulation examined a biological process (i.e., growth,  
312

313 conjugation) in isolation by manipulating one or two of the relevant parameters. For  
 314 Section 4b-d, we used a “baseline” set of parameters ( $\psi_D = \psi_R = \psi_T = 1$ , and  
 315  $\gamma_D = \gamma_T = 1 \times 10^{-6}$ ) and initial densities ( $D_0 = R_0 = 1 \times 10^2$  and  $T_0 = 0$ ) unless  
 316 otherwise indicated. For each initial parameter setting, we simulated 10,000 parallel  
 317 populations and calculated the conjugation rate using various methods (TDR, SIM, ASM,  
 318 and LDM). The incubation time selection criteria used for the SIM estimate was also used  
 319 for the TDR and ASM estimates (see Materials and Methods and Table E). However,  
 320 given that all our simulated populations *increase in size* over the incubation time, a  
 321 fundamental assumption of the TDR approach is broken for all the runs (i.e., no change  
 322 in the density due to growth). The TDR estimate was included to be comprehensive (and  
 323 illustrate that violation of the no growth assumption leads to systemic bias). Also, we note  
 324 that we calculated the ASM metric in all scenarios and that in some cases the incubation  
 325 time  $\tilde{t}$  passed the critical time threshold ( $t_{crit}$ ) where the ASM assumptions break down  
 326 (see Section 1a). The ASM estimate was included in all scenarios to be comprehensive  
 327 and illustrate that implementing the assay after  $t_{crit}$  can lead to bias. Given that the  
 328 chosen incubation time  $\tilde{t}$  to evaluate these simulations is early, it highlights that for some  
 329 parametric combinations proper implementation of the ASM metric is not possible. Given  
 330 that the Gillespie algorithm is computationally expensive and the large number of  
 331 simulations needed to sweep through parameters, we chose low initial densities and high  
 332 conjugation rates for the baseline condition. In Section 4e, we demonstrate that the trends  
 333 shown for the baseline condition are also observed with more realistic parameter values  
 334 and higher initial densities.

**Table E: Specific incubation times ( $\tilde{t}$ ) used in stochastic simulations to compare across parameter settings.** Each row lists the relevant figure and the corresponding x-axis value. Time is given in hours. For each parameter setting, the incubation time  $\tilde{t}$  for the LDM estimate is set to the average  $t^*$ , and for the SIM estimate is given by the time point for which an average of 50 transconjugants is reached.

| Figure        | x-axis value    | $\tilde{t}_{LDM}$ | $\tilde{t}_{SIM}$ |
|---------------|-----------------|-------------------|-------------------|
| Fig 4, Fig Aa | 0.0625          | 4.34              | 7.89              |
| Fig 4, Fig Aa | 0.125           | 4.11              | 7.49              |
| Fig 4, Fig Aa | 0.25            | 3.7               | 6.78              |
| Fig 4, Fig Aa | 0.5             | 3.1               | 5.67              |
| Fig 4, Fig Aa | 1               | 2.35              | 4.27              |
| Fig 4, Fig Aa | 2               | 1.61              | 2.86              |
| Fig 4, Fig Aa | 4               | 1.01              | 1.74              |
| Fig 4, Fig Aa | 8               | 0.6               | 1                 |
| Fig 4, Fig C  | $1 \times 10^9$ | 2.35              | 4.27              |
| Fig 4, Fig C  | $1 \times 10^8$ | 2.35              | 4.27              |
| Fig 4, Fig C  | $1 \times 10^7$ | 2.35              | 4.27              |
| Fig 4, Fig C  | $1 \times 10^6$ | 2.35              | 4.27              |
| Fig 4, Fig C  | $1 \times 10^5$ | 2.35              | 4.25              |
| Fig 4, Fig C  | $1 \times 10^4$ | 2.33              | 4.11              |
| Fig 4, Fig C  | $1 \times 10^3$ | 2.16              | 3.4               |
| Fig 4, Fig C  | $1 \times 10^2$ | 1.44              | 2.02              |
| Fig Ab        | 0.0625          | 4.35              | 8.18              |

|        |         |      |      |
|--------|---------|------|------|
| Fig Ab | 0.125   | 4.11 | 7.66 |
| Fig Ab | 0.25    | 3.71 | 6.85 |
| Fig Ab | 0.5     | 3.1  | 5.69 |
| Fig Ab | 1       | 2.35 | 4.27 |
| Fig Ab | 2       | 1.61 | 2.86 |
| Fig Ab | 4       | 1.01 | 1.74 |
| Fig Ab | 8       | 0.6  | 0.99 |
| Fig Ba | 0.0625  | 3.3  | 6.4  |
| Fig Ba | 0.125   | 3.22 | 6.23 |
| Fig Ba | 0.25    | 3.07 | 5.89 |
| Fig Ba | 0.5     | 2.8  | 5.26 |
| Fig Ba | 1       | 2.35 | 4.27 |
| Fig Ba | 2       | 1.78 | 3.07 |
| Fig Ba | 4       | 1.2  | 1.99 |
| Fig Ba | 8       | 0.74 | 1.15 |
| Fig Bb | 0.0625  | 3.31 | 6.45 |
| Fig Bb | 0.125   | 3.23 | 6.27 |
| Fig Bb | 0.25    | 3.07 | 5.92 |
| Fig Bb | 0.5     | 2.8  | 5.27 |
| Fig Bb | 1       | 2.35 | 4.27 |
| Fig Bb | 2       | 1.78 | 3.07 |
| Fig Bb | 4       | 1.2  | 1.97 |
| Fig Bb | 8       | 0.74 | 1.15 |
| Fig Bc | 0.0625  | 2.64 | 4.59 |
| Fig Bc | 0.125   | 2.62 | 4.57 |
| Fig Bc | 0.25    | 2.59 | 4.54 |
| Fig Bc | 0.5     | 2.52 | 4.46 |
| Fig Bc | 1       | 2.35 | 4.27 |
| Fig Bc | 2       | 1.97 | 3.62 |
| Fig Bc | 4       | 1.34 | 2.31 |
| Fig Bc | 8       | 0.8  | 1.29 |
| Fig D  | 0.00001 | 2.35 | 4.27 |
| Fig D  | 0.0001  | 2.35 | 4.27 |
| Fig D  | 0.001   | 2.35 | 4.27 |
| Fig D  | 0.01    | 2.36 | 4.29 |
| Fig D  | 0.1     | 2.47 | 4.49 |

Section 4b : The effect of unequal growth rates

We expanded the analysis used in Fig 4a by calculating a conjugation rate estimate with two additional estimates, TDR and ASM (Fig Aa). We simulated an additional biological scenario (Fig Ab) in which growth rates differ due to the host; i.e., where recipients and transconjugants grow faster ( $\psi_D < \psi_T = \psi_R$ ) or slower ( $\psi_D > \psi_T = \psi_R$ ) than the donors. This captures the situation in which the recipient (and therefore

342  
343  
344  
345

transconjugant) is a different strain or species from the donor and differs in growth rate. Like the conclusions drawn from Fig 4 with the effects of plasmid carriage, the LDM exhibited high accuracy and precision relative to other metrics.

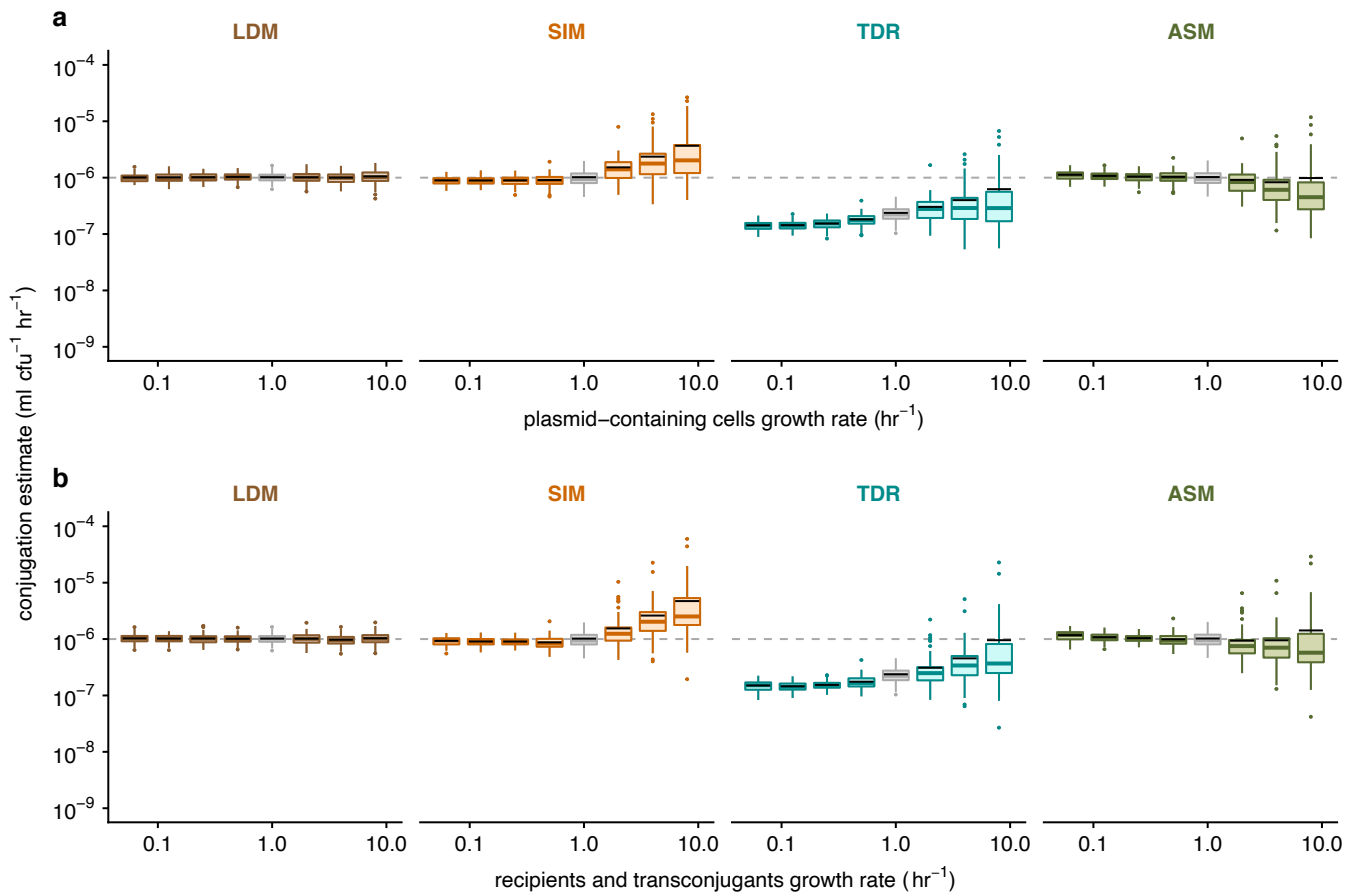

346  
347  
348  
349  
350  
351  
352  
353  
354  
355  
356  
357  
358  
359  
360  
361  
362  
363  
364

**Fig A: The effect of heterogeneous growth rates on estimating conjugation rate.** The Gillespie algorithm was used to simulate population dynamics. 100 estimates of the donor conjugation rate are shown for each parameter combination (summarized using boxplots with the same graphical convention as in Fig 3). The gray dashed line indicates the true value for the donor conjugation rate (here,  $10^{-6}$ ). The boxes in gray indicate the baseline parameter setting, and all colored boxes represent deviation of one or two parameters from baseline. The baseline parameter values were  $\psi_D = \psi_R = \psi_T = 1$ , and  $\gamma_D = \gamma_T = 10^{-6}$ . The dynamic variables were initialized with  $D_0 = R_0 = 10^2$  and  $T_0 = 0$ . All incubation times are short but are specific to each parameter setting (see Materials and Methods and Table E for details). The LDM, SIM, TDR, and ASM estimates are in separate plots with estimate specific colors (brown, orange, cyan, and green, respectively). Zero estimates were set to  $10^{-9}$  (the lowest y-value) for plotting on a log axis. (a) Unequal growth rates were explored over a range of growth rates for the plasmid-bearing strains, namely  $\psi_D = \psi_T \in \{0.0625, 0.125, 0.25, 0.5, 1, 2, 4, 8\}$ . (b) Unequal growth rates were explored over a range of growth rates for the recipients and transconjugants, namely  $\psi_R = \psi_T \in \{0.0625, 0.125, 0.25, 0.5, 1, 2, 4, 8\}$ . The data and code needed to generate this figure can be found at <https://github.com/livkosterlitz/LDM> or <https://doi.org/10.5281/zenodo.6677158>.

365  
366  
367  
368  
369  
370

In addition, we explored the effect of a single population (donor, recipient, and transconjugant) growing faster or slower in isolation (Fig B). Notably, a faster transconjugant growth rate led to very large variance with the other metrics (TDR, SIM, and ASM). Therefore, some parameter settings shown in Fig Bc have a large proportion of the simulations yielding a zero estimate at the specific incubation time. Given the log-axis, the zero estimates were placed at the lowest y-value for plotting purposes.

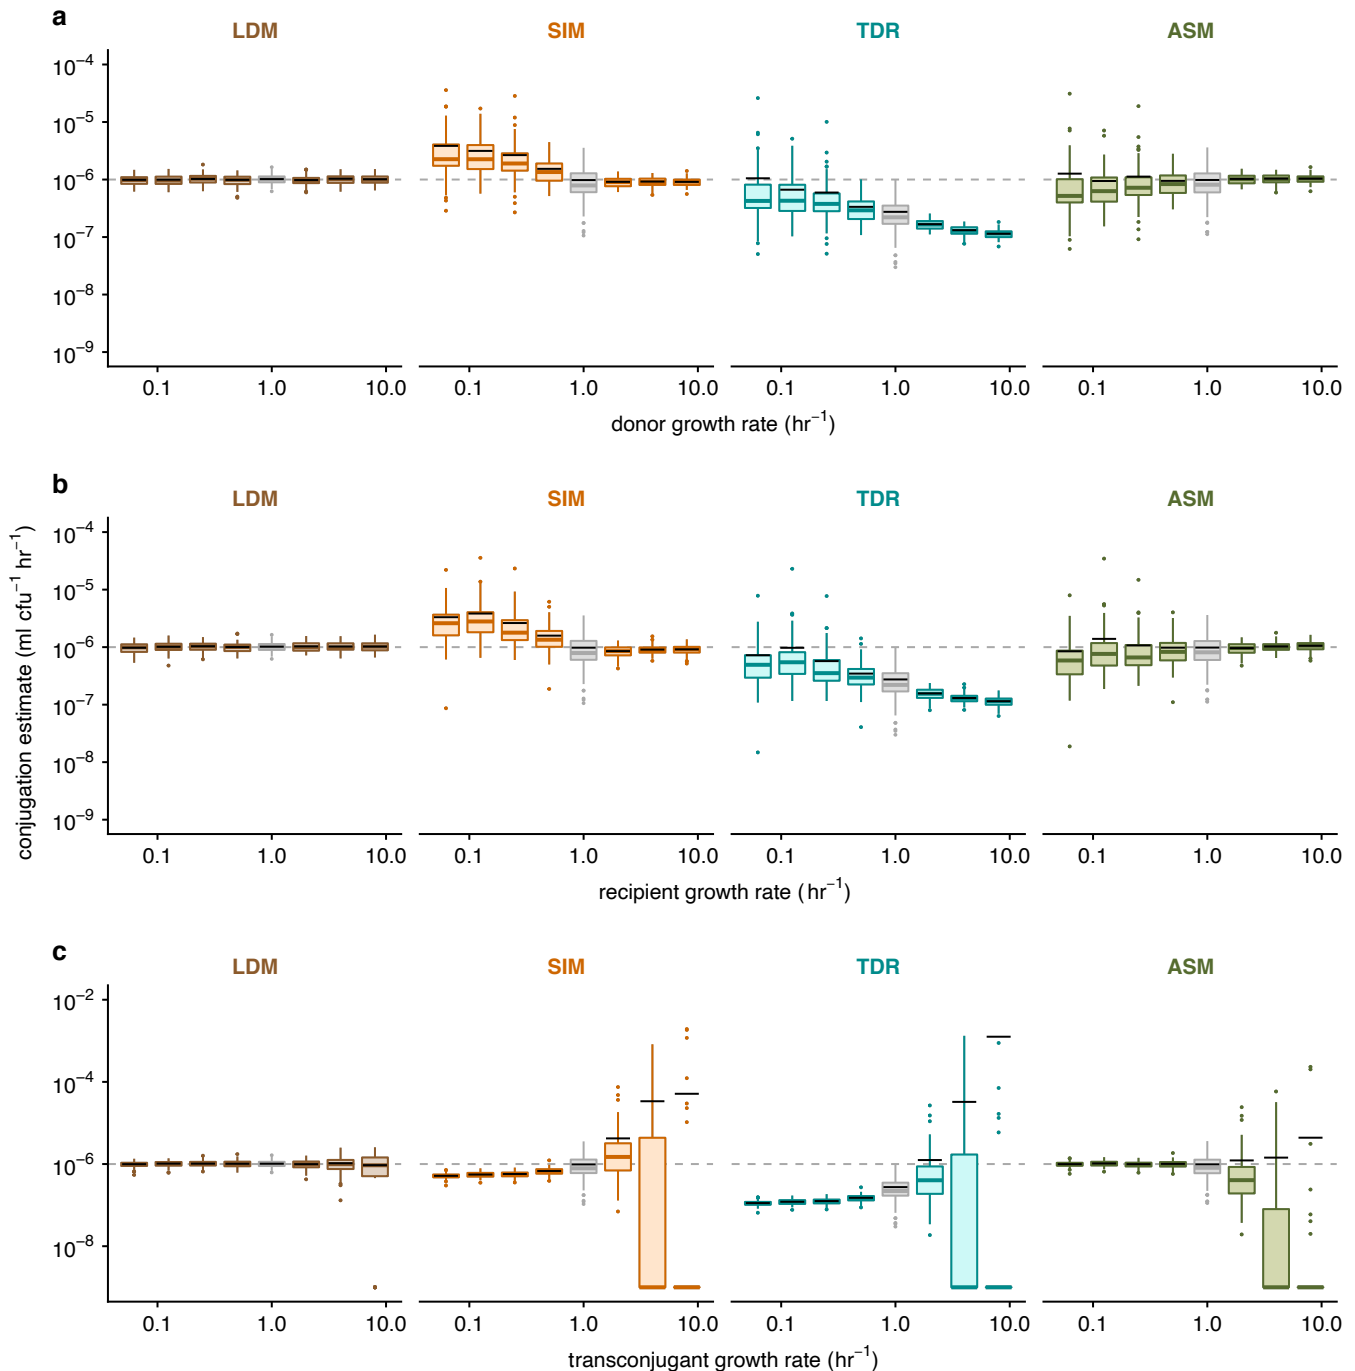

371  
372  
373  
374  
375

**Fig B: The effect of population-specific heterogeneous growth rates on estimating conjugation rate.** Boxplots are using the same graphical representation as Fig A. (a, b, c) Unequal growth rates were explored over a range of growth rates for the donors, recipients, and transconjugants, respectively, namely  $\psi_x \in \{0.0625, 0.125, 0.25, 0.5, 1, 2, 4, 8\}$ . Zero estimates were set to 10<sup>-9</sup> for plotting on a log axis. The data and code

376  
377  
378  
379  
380  
381  
382  
383  
384  
385

needed to generate this figure can be found at <https://github.com/livkosterlitz/LDM> or <https://doi.org/10.5281/zenodo.6677158>.

Section 4c : The effect of unequal conjugation rates

We expanded the analysis used in Fig 4b by calculating a conjugation rate estimate with two additional estimates, TDR and ASM (Fig C). Like the conclusions drawn from Fig 4b with the effects of heterogenous conjugation rate, the LDM exhibited high accuracy and precision relative to other metrics.

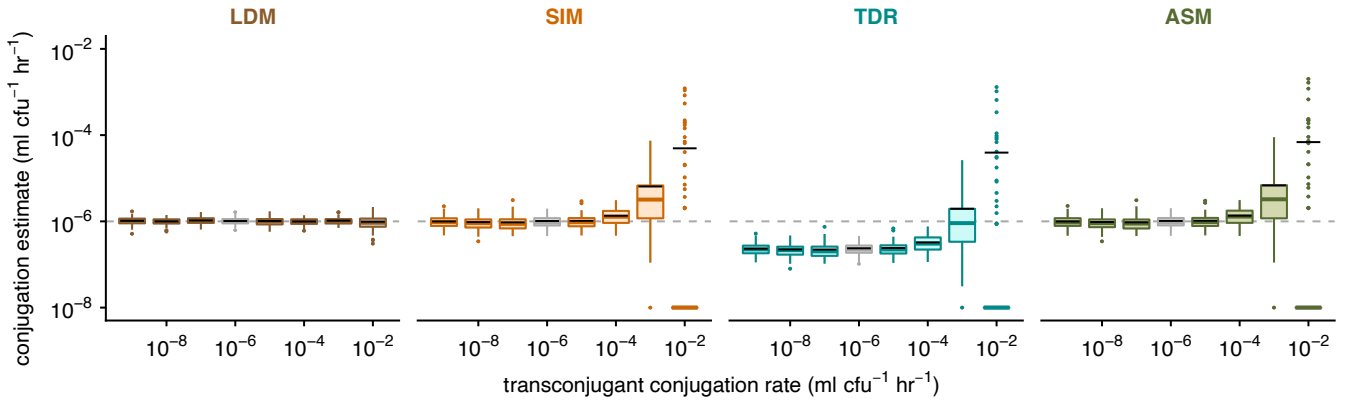

386  
387  
388  
389  
390  
391

**Fig C: The effect of heterogenous conjugation rates on estimating conjugation rate.** Boxplots are using the same graphical representation as Fig A. Unequal conjugation rates were probed over a range of transconjugant conjugation rates, namely  $\gamma_T \in \{10^{-9}, 10^{-8}, 10^{-7}, 10^{-6}, 10^{-5}, 10^{-4}, 10^{-3}, 10^{-2}\}$ . Zero estimates were set to  $10^{-8}$  for plotting on a log axis. The data and code needed to generate this figure can be found at <https://github.com/livkosterlitz/LDM> or <https://doi.org/10.5281/zenodo.6677158>.

392

Section 4d : The effect of a non-zero plasmid loss rate

393  
394  
395  
396  
397  
398  
399  
400  
401  
402  
403  
404  
405  
406

We extended the base model (equations [1] - [3]) to include plasmid loss due to improper plasmid segregation. Thus, transconjugants are transformed into plasmid-free recipients due to improper segregation of the plasmid at rate  $\tau_T$ . The donors are transformed into plasmid-free cells due to improper segregation of the plasmid at rate  $\tau_D$ . Therefore, the extended model (equations [4.1] - [4.4]) tracks the change in density of a new population type, plasmid-free former donors ( $F$ ). In total, the extended model describes the change in density of four populations ( $D$ ,  $R$ ,  $T$ , and  $F$ ) due to various biological parameters: growth rates ( $\psi_D$ ,  $\psi_R$ ,  $\psi_T$ , and  $\psi_F$ ), conjugation rates ( $\gamma_{DR}$ ,  $\gamma_{TR}$ ,  $\gamma_{DF}$ , and  $\gamma_{TF}$ ), and plasmid loss rates ( $\tau_D$  and  $\tau_T$ ). Importantly, we note that all conjugation rates are dyad-specific (i.e., donor-recipient-specific); therefore, our simulation framework is built to allow all rates to be unique. Since the new population type is a possible plasmid recipient, the subscript on the conjugation rate parameter now indicates the plasmid-bearing cell type and the plasmid-free cell type (e.g.,  $\gamma_{TF}$  indicates the conjugation rate between a transconjugant and a plasmid-free former donor).

$$\frac{dD}{dt} = \psi_D D + (\gamma_{DF} D + \gamma_{TF} T) F - \tau_D D, \quad [4.1]$$

$$\frac{dR}{dt} = \psi_R R - (\gamma_{DR} D + \gamma_{TR} T) R + \tau_T T, \quad [4.2]$$

$$\frac{dT}{dt} = \psi_T T + (\gamma_{DR} D + \gamma_{TR} T) R - \tau_T T. \quad [4.3]$$

$$\frac{dF}{dt} = \psi_F F - (\gamma_{DF} D + \gamma_{TF} T) F + \tau_D D. \quad [4.4]$$

407 Plasmid loss due to improper segregation is a common occurrence in plasmid  
 408 populations and violates a model assumption underlying all the conjugation rate  
 409 estimates. We simulated a range of plasmid loss rates, ranging from low ( $\tau_D = \tau_T =$   
 410  $0.0001$ ) to high ( $\tau_D = \tau_T = 0.1$ ). The LDM had high accuracy and precision across all  
 411 parameter settings (Fig D). The effect of plasmid loss was undetectable even for an  
 412 extremely high loss rate ( $\tau_D = \tau_T = 0.1$ ). Similarly, the effect of plasmid loss was  
 413 undetectable on the other conjugation estimates compared to their performance with a  
 414 zero loss rate. Thus, we find that all estimates appear robust with regards to an  
 415 introduction of plasmid loss.

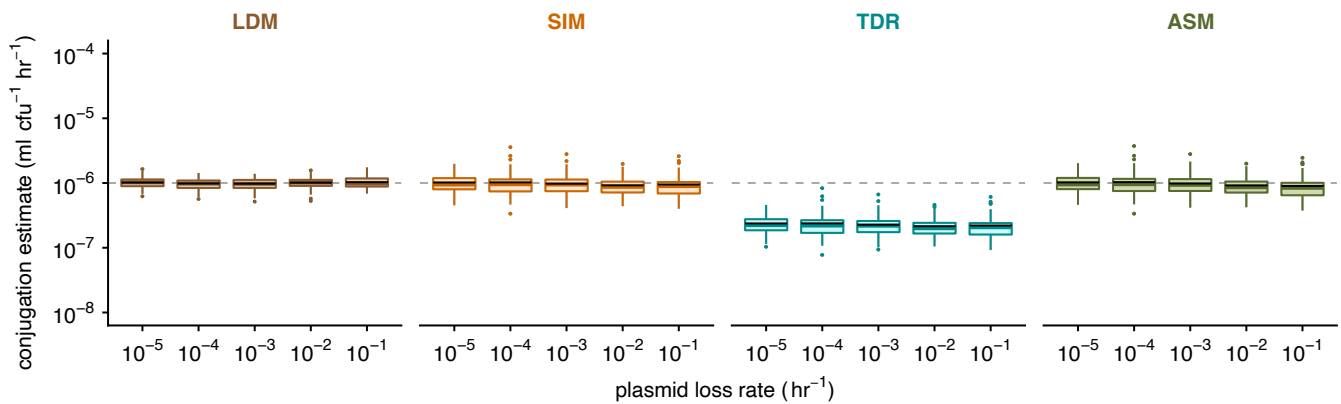

416 **Fig D : The effect of non-zero plasmid loss rates on estimating conjugation rate.**  
 417 Boxplots are using the same graphical representation as Fig A. We explored improper  
 418 plasmid segregation by considering a range of plasmid loss rates  $\tau_D = \tau_T \in \{0.00001,$   
 419  $0.0001, 0.001, 0.01, 0.1\}$ . The data and code needed to generate this figure can be found  
 420 at <https://github.com/livkosterlitz/LDM> or <https://doi.org/10.5281/zenodo.6677158>.  
 421

#### 422 Section 4e : The effect of incubation time using realistic parameter settings

423  
 424 We expanded the analysis used in Fig 3 by calculating conjugation rate with two  
 425 additional estimates, TDR and ASM. In addition, we explored the effects of incubation  
 426 time in conjunction with other heterogenous parameter settings and a non-zero plasmid  
 427 loss rate using realistic parameter settings. Given the computational expense of using  
 428 realistic parameter values and higher initial densities, we explored five parameter  
 429 combinations and the results are summarized in Fig E. We set more reasonable initial  
 430 densities of the donors and recipients ( $D_0 = R_0 = 1 \times 10^5$ ) and a conjugation rate that is  
 431 often reported in the literature ( $\gamma_{DR} = \gamma_{DF} = \gamma_{TR} = \gamma_{TF} = 1 \times 10^{-14}$ ) unless otherwise  
 432 indicated. The conjugation rate was estimated for each method at 30-minute intervals.  
 433 For each time interval, we applied estimate-specific filters. For the LDM estimate, a 30-  
 434 minute interval was shown if at least one parallel population had zero transconjugants.  
 435 For the other estimates (SIM, TDR, and ASM), the 30-minute interval were shown if at



436  
437  
438  
439  
440  
441  
442  
443

least 90 percent of the simulated populations contained transconjugants at the incubation time.

The LDM estimate had high accuracy over all incubation times for all scenarios with precision increasing through time for the range explored. The other estimates also become more precise over time. However, their greater precision over time was sometimes accompanied by decreased accuracy. We note these inaccuracies recaptured the qualitative patterns revealed in the parameter sweeps. Again, the LDM estimate performed as well or better than other estimates across incubation times.

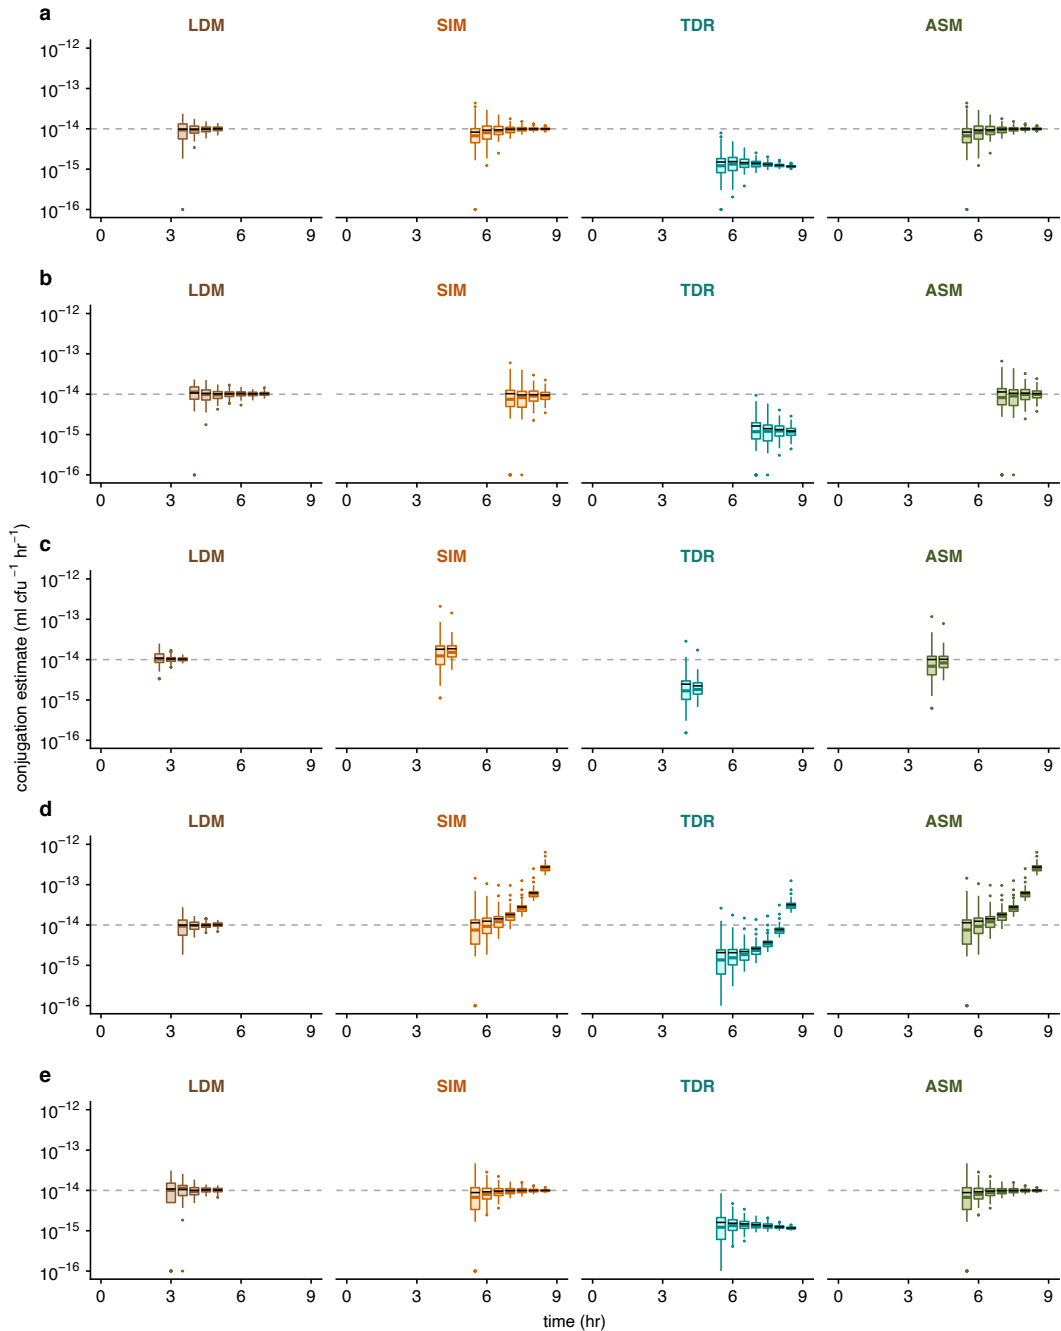

444  
445  
446  
447  
448

**Fig E : The effect of incubation time ( $\bar{t}$ ) on estimating conjugation rate.** The Gillespie algorithm with equations [4.1]-[4.4] was used to simulate population dynamics. Donor conjugation rate for each parameter combination was estimated at 30-minute intervals (summarized using boxplots with the same graphical convention as in Fig 3). The gray dashed line indicates the true value for the donor conjugation rate (here,  $10^{-14}$ ). The

449 baseline parameter values were  $\psi_D = \psi_R = \psi_T = \psi_F = 1$ ,  $\gamma_{DR} = \gamma_{DF} = \gamma_{TR} = \gamma_{TF} =$   
 450  $1 \times 10^{-14}$ , and  $\tau_D = \tau_T = 0$ . The dynamic variables were initialized with  $D_0 = R_0 = 10^5$   
 451 and  $T_0 = F_0 = 0$ . The LDM, SIM, TDR, and ASM estimates are in separate plots with  
 452 estimate-specific colors (brown, orange, cyan, and green, respectively). (a) Baseline  
 453 parameters were simulated as the non-heterogenous parameter comparison. (b) An  
 454 unequal growth rate was simulated with  $\psi_D = \psi_T = 0.5$ . (c) An unequal growth rate was  
 455 simulated with  $\psi_R = \psi_T = 2$ . (d) An unequal conjugation rate was simulated with  $\gamma_{TR} =$   
 456  $10^{-8}$ . (e) A non-zero plasmid loss rate was simulated with  $\tau_D = \tau_T = 0.0001$ . The data  
 457 and code needed to generate this figure can be found at  
 458 <https://github.com/livkosterlitz/LDM> or <https://doi.org/10.5281/zenodo.6677158>.  
 459

460 *Section 4f : Modified Levin et. al. model with Monod growth and conjugation*

461  
 462 To investigate the incongruency observed between the SIM and LDM estimates  
 463 for the cross-species mating assay in Fig 6, we extend equations [4.1]-[4.4] to incorporate  
 464 batch culture dynamics by tracking the change in resource concentration:

$$\frac{dD}{dt} = \psi_D(C)D + \gamma_{DF}(C)DF + \gamma_{TF}(C)TF - \tau_D(C)D, \quad [4.5]$$

$$\frac{dR}{dt} = \psi_R(C)R - \gamma_{DR}(C)DR - \gamma_{TR}(C)TR + \tau_T(C)T, \quad [4.6]$$

$$\frac{dT}{dt} = \psi_T(C)T + \gamma_{DR}(C)DR + \gamma_{TR}(C)TR - \tau_T(C)T, \quad [4.7]$$

$$\frac{dF}{dt} = \psi_F(C)F - \gamma_{DF}(C)DF - \gamma_{TF}(C)TF + \tau_D(C)D, \quad [4.8]$$

$$\frac{dC}{dt} = -(\psi_D(C)D + \psi_R(C)R + \psi_T(C)T + \psi_F(C)F)e. \quad [4.9]$$

465 where  $e$  is the amount of resource required to produce a new cell. With the addition of a  
 466 resource equation, there is an added assumption that growth, conjugation, and plasmid  
 467 loss are Monod functions of resource concentration  $C$ :

$$\psi_X(C) = \psi_{X_{max}} \left( \frac{C}{Q + C} \right), \quad [4.10]$$

$$\gamma_{XY}(C) = \gamma_{XY_{max}} \left( \frac{C}{Q + C} \right), \quad [4.11]$$

$$\tau_X(C) = \tau_{X_{max}} \left( \frac{C}{Q + C} \right), \quad [4.12]$$

468 where  $Q$  is the half saturation constant, and  $\psi_{X_{max}}$ ,  $\gamma_{XY_{max}}$ , and  $\tau_{X_{max}}$  are the maximum  
 469 growth, conjugation, and plasmid loss rates for relevant cell types  $X$  and  $Y$ , respectively.  
 470 In other words, growth, conjugation, and plasmid loss decline and eventually turn off as  
 471 resource concentration goes to zero.  
 472

473 *Section 4g : Deterministic simulations with the Monod model using cross-*  
 474 *species case study parameters*

475  
 476 Here, we used equations [4.5]-[4.12] that incorporate batch culture dynamics to  
 477 simulate the cross-species case study with the experimental parameters to investigate

478 the incongruity observed between the SIM and LDM estimates for the cross-species  
 479 mating assay in Fig 6. Most of the parameters were from the average of six experiments  
 480 ( $D_0 = 1.17 \times 10^5$ ,  $R_0 = 3.33 \times 10^4$ ,  $\psi_D = 1.91$ ,  $\psi_R = 1.47$ ,  $\psi_T = 1.48$ ,  $\gamma_{DR} = 1.96 \times 10^{-13}$ , and  
 481  $\gamma_{TR} = 1.96 \times 10^{-7}$ ) with the remaining parameters informed by the 24 hour densities as to  
 482 mimic the batch culture conditions of the experiment ( $C_0 = 4.41 \times 10^9$ ,  $Q = 1 \times 10^7$ , and  $e$   
 483  $= 1$ ). We used the numerical solution to calculate the SIM estimate over time.

484 We compared the numerical solution to the actual experimental measurements  
 485 from the cross-species experiments. The simulated density and conjugation estimate (Fig  
 486 Fa solid lines) were similar to the average experimental densities and the experimental  
 487 SIM estimate (Fig Fa circle data points). Thus, the experimental LDM estimates for the  
 488 cross-species ( $\gamma_{DR} = 1.96 \times 10^{-13}$ ) and within-species ( $\gamma_{TR} = 1.96 \times 10^{-7}$ ) conjugation rates  
 489 along with the measured growth rates are sufficient to recapture a relatively inflated  
 490 experimental SIM estimate. In contrast, a simulation with homogenous conjugation rates  
 491 using either the cross- or within-species conjugation rate does not closely align with the  
 492 experimental data (Fig Fb and c, respectively). These simulations also demonstrate that  
 493 the heterogeneity in the measured growth rates is insufficient to produce the mismatch  
 494 observed in the experimental data (Fig Fb and c). This was worth checking given that  
 495 heterogeneity in growth rates violates a modeling assumption of the SIM approach. This  
 496 adds further support that the parametric heterogeneity (i.e.,  $\gamma_D \neq \gamma_T$ ) in the conjugation  
 497 rates is the potential cause for the incongruity between the LDM and SIM estimates  
 498 reported in Fig 6.

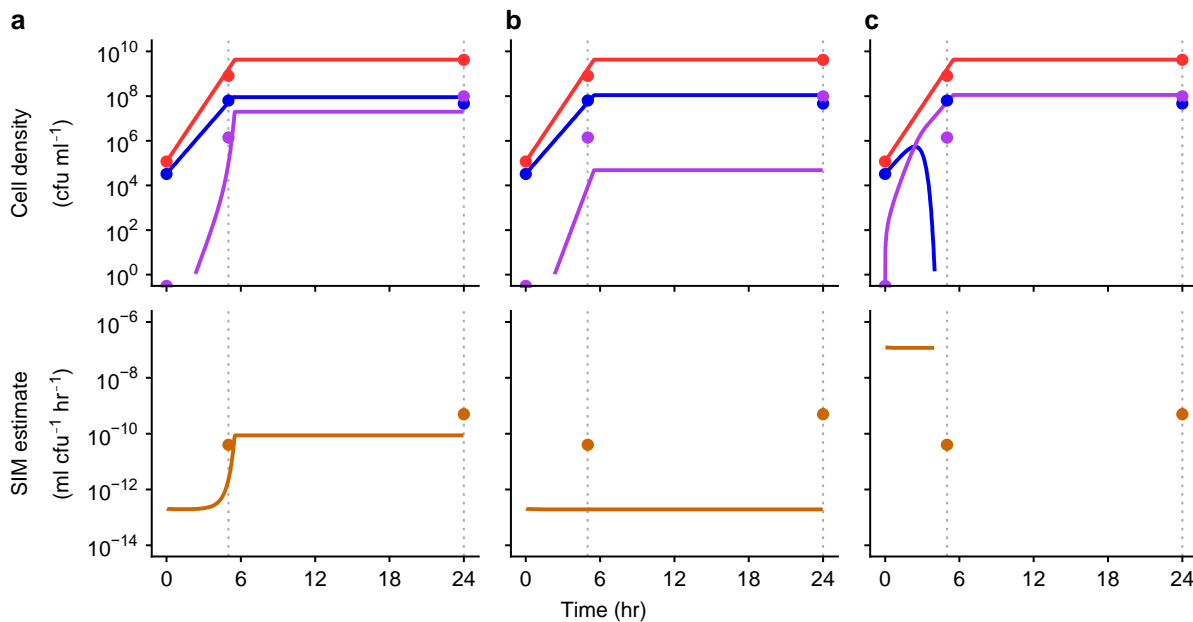

499 **Fig F : Numerical simulation of extended model with Monod functions using**  
 500 **experimental parameters.** Deterministic numerical solutions of equations [4.5]-[4.12]  
 501 showing donor, recipient, and transconjugant densities (red, blue, and purple solid  
 502 trajectories, respectively) increasing over time using experimental parameter estimates  
 503 ( $D_0 = 1.17 \times 10^5$ ,  $R_0 = 3.33 \times 10^4$ ,  $\psi_D = 1.91$ ,  $\psi_R = 1.47$ ,  $\psi_T = 1.48$ ,  $\gamma_{DR} = 1.96 \times 10^{-13}$ , and  
 504  $\gamma_{TR} = 1.96 \times 10^{-7}$ ) and batch culture parameters ( $C_0 = 4.41 \times 10^9$ ,  $Q = 1 \times 10^7$ , and  $e = 1$ )  
 505 unless otherwise indicated. The averaged experimental data is overlaid onto each part  
 506 (circle data points) at both incubation times (grey dotted line at  $t = 5$  and  $t = 24$ ). (a) The  
 507 numerical solution with the experimental parameter estimates were close to the

508 experimental measurements. (b) A scenario with homogenous low conjugation rates ( $\gamma_{DR}$   
509 =  $\gamma_{TR} = 1.96 \times 10^{-13}$ ) deviates markedly from the experimental measurements. (c) A  
510 scenario with homogenous high conjugation rates ( $\gamma_{DR} = \gamma_{TR} = 1.96 \times 10^{-7}$ ) deviates  
511 substantially from the experimental measurements. The data and code needed to  
512 generate this figure can be found at <https://github.com/livkosterlitz/LDM> or  
513 <https://doi.org/10.5281/zenodo.6677158>.  
514

#### 515 Section 4h : Violation of the Levin et. al. model Monod equation assumptions 516

517 In this section, we explored a violation of a modeling assumption in the SIM  
518 approach by using a model variation where the functional form of the growth rates and  
519 conjugation rates are not proportional. This is relevant given that there are plasmid  
520 systems that will readily violate this proportional assumption (e.g., IncP plasmids). Here,  
521 we assume that while growth rates follow the Monod equation, conjugation rates are not  
522 dependent on resource and remain constant after resources are depleted. We found that  
523 using this model and the same experimentally measured parameter values in Fig F  
524 resulted in a higher SIM estimate as the culture enters stationary phase (Fig Ga)  
525 compared to the scenario where conjugation rates are proportional to growth rates (Fig  
526 Gb). It is worth noting that by using this new model and these particular parameter values,  
527 the recipient pool is completely depleted which coincides with the SIM estimate no longer  
528 being a finite, positive value. This differs from Fig Gb where the SIM estimate hits an  
529 asymptote remaining at a finite, positive value. In this case, the recipient pool is not  
530 depleted because in this version of the model (Section 4f) the conjugation rates approach  
531 zero as the resources are depleted. We acknowledge that a violation of the proportional  
532 assumption would lead to an inflation of the SIM estimate, which is the same pattern we  
533 show in our experimental results in Fig 6. However, we used an IncF plasmid in our  
534 experiment which was the plasmid system used in the original SIM study where the  
535 experimental results were consistent with a proportional relationship. We note that this  
536 analysis is relevant to other plasmid systems where this assumption is known to be  
537 violated or has not been experimentally validated.

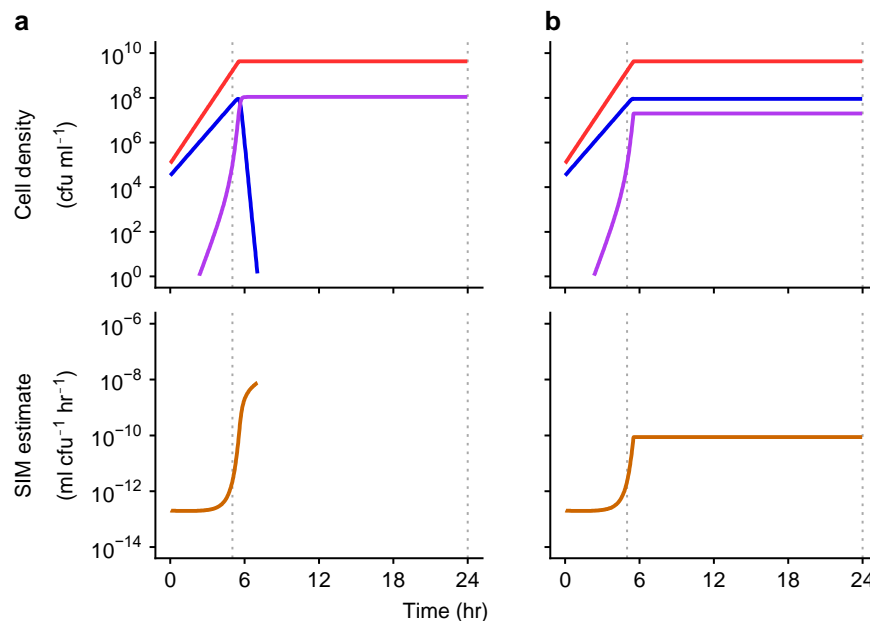

538 **Fig G: Numerical simulation of a modified model with constant conjugation rates**  
 539 **with Monod functions for growth.** The same equations and parameters from Fig F are  
 540 used throughout unless otherwise indicated. (a) A model modification is made where  
 541 conjugation rates are no longer proportional to growth rates. Specifically, conjugation  
 542 rates are constant (i.e., not resource dependent). (b) The same panel in Fig Fa for  
 543 comparison. The data and code needed to generate this figure can be found at  
 544 <https://github.com/livkosterlitz/LDM> or <https://doi.org/10.5281/zenodo.6677158>.  
 545

### 546 **Section 5 : Experimental volume unit conversion using $f$**

547 In this section, we walk through the addition of  $f$  to the LDM estimate. This is  
 548 important to maintain the typical units ml/(h · cfu) used for reporting the conjugation  
 549 rates. In the original differential equations [1]-[3], the units of the dynamic variables were  
 550 cfu/ml. If we want to deal with numbers instead of density, let us define a new volume  
 551 unit termed the “evu” standing for “experimental volume unit” where we will assume there  
 552 are  $f$  evu’s per ml. Focusing on the number of donors in the experiment (which we label  
 553  $\check{D}$ ), we have the following conversion:

$$554 \quad \check{D} \left( \frac{\text{cfu}}{\text{evu}} \right) = \frac{D \left( \frac{\text{cfu}}{\text{ml}} \right)}{f \frac{\text{evu}}{\text{ml}}},$$

555 Focusing on the numerical values (and ignoring the units for what follows), we have

$$556 \quad \check{D} = \frac{D}{f},$$

$$557 \quad \check{R} = \frac{R}{f},$$

$$558 \quad \check{T} = \frac{T}{f}.$$

559 In our original differential equations, let us multiply both sides of all the differential  
 560 equations by  $1/f$ , yielding:

$$561 \quad \frac{1}{f} \frac{dD}{dt} = \psi_D \frac{1}{f} D,$$

$$562 \quad \frac{1}{f} \frac{dR}{dt} = \psi_R \frac{1}{f} R - (\gamma_D D + \gamma_T T) \frac{1}{f} R,$$

$$563 \quad \frac{1}{f} \frac{dT}{dt} = \psi_T \frac{1}{f} T + (\gamma_D D + \gamma_T T) \frac{1}{f} R.$$

564 This can be reworked as

$$565 \quad \frac{d\check{D}}{dt} = \psi_D \check{D},$$

$$566 \quad \frac{d\check{R}}{dt} = \psi_R \check{R} - (\gamma_D D + \gamma_T T) \check{R},$$

$$567 \quad \frac{d\check{T}}{dt} = \psi_T \check{T} + (\gamma_D D + \gamma_T T) \check{R}.$$

568 It follows that:

$$569 \quad \frac{d\check{D}}{dt} = \psi_D \check{D},$$

$$570 \quad \frac{d\check{R}}{dt} = \psi_R \check{R} - (f\gamma_D \check{D} + f\gamma_T \check{T}) \check{R},$$

$$571 \quad \frac{d\check{T}}{dt} = \psi_T \check{T} + (f\gamma_D \check{D} + f\gamma_T \check{T}) \check{R}.$$

572 If we let

$$\check{\gamma}_D = f\gamma_D,$$

573  
574 and

$$\check{\gamma}_T = f\gamma_T.$$

575  
576 then the above system becomes

$$\frac{d\check{D}}{dt} = \psi_D\check{D},$$

$$\frac{d\check{R}}{dt} = \psi_R\check{R} - (\check{\gamma}_D\check{D} + \check{\gamma}_T\check{T})\check{R},$$

$$\frac{d\check{T}}{dt} = \psi_T\check{T} + (\check{\gamma}_D\check{D} + \check{\gamma}_T\check{T})\check{R}.$$

580 This set of equations tracks the number of cells (per evu). Thus, if the above equations  
581 were used, then the derivations of the LDM estimate could flow exactly like we show in  
582 Section 2. That is, the following will be correct:

$$\check{\gamma}_D = -\ln p_0(\check{t}) \left( \frac{\psi_D + \psi_R}{\check{D}_0\check{R}_0(e^{(\psi_D+\psi_R)\check{t}} - 1)} \right)$$

584 Note, no correction is needed on  $p_0(\check{t})$  as everything is in terms of numbers, which was  
585 how this quantity was derived. Because  $\check{D} = \frac{D}{f}$  and  $\check{R} = \frac{R}{f}$ , we can rewrite the above as

$$\check{\gamma}_D = -\ln p_0(\check{t}) \left( \frac{\psi_D + \psi_R}{\frac{D_0}{f}\frac{R_0}{f}(e^{(\psi_D+\psi_R)\check{t}} - 1)} \right)$$

587 Or:

$$\frac{\check{\gamma}_D}{f} = f \left\{ -\ln p_0(\check{t}) \left( \frac{\psi_D + \psi_R}{D_0R_0(e^{(\psi_D+\psi_R)\check{t}} - 1)} \right) \right\}$$

589 Because  $\gamma_D = \frac{\check{\gamma}_D}{f}$ , we have

$$\gamma_D = f \left\{ -\ln p_0(\check{t}) \left( \frac{\psi_D + \psi_R}{D_0R_0(e^{(\psi_D+\psi_R)\check{t}} - 1)} \right) \right\}$$

591 Note that if our evu was 1 ml, then  $f = 1$  and we could use our estimate exactly as written  
592 in equation [11]. Generally, we have to correct our original metric by multiplying by  $f$ .

## 593 594 **Section 6 : Extended Experimental Methods and Results**

595  
596 *Section 6a : Strains.*

597  
598 *Escherichia coli* K-12 BW25113 from the Top Lab was used as the ancestor of the  
599 three *E. coli* strains in this study. To derive the first strain, *E. coli* BW25113 was grown  
600 overnight and plated onto LB agar supplemented with 100  $\mu\text{g ml}^{-1}$  streptomycin. A single  
601 streptomycin-resistant colony was selected and used to create an isogenic glycerol stock,  
602 *E. coli* K-12 BW25113 str<sup>R</sup>, to be used as the plasmid-free *E. coli* recipient in this study  
603 (hereafter 'E(Ø)').

604 To derive the second strain, *E. coli* K-12 BW25113 was mixed with a host carrying  
605 the focal conjugative plasmid and incubated overnight in LB medium to facilitate plasmid  
606 transfer. The focal plasmid was the modified IncF conjugative plasmid F'42 (hereafter  
607 'pF') in which a tetracycline resistance gene was inserted using lambda red recombination  
608 (8). The mixture was plated onto LB agar supplemented with 100  $\mu\text{g ml}^{-1}$  ampicillin (host  
609 selection) and 15  $\mu\text{g ml}^{-1}$  tetracycline (pF plasmid selection) to select for *E. coli* K-12  
610 BW25113 host containing the pF plasmid. A single colony was selected and used to

611 create an isogenic glycerol stock to be used as the plasmid-containing *E. coli* donor in  
612 this study (hereafter 'E(pF)').

613 To derive the third strain, E(pF) was mixed with E(∅) and incubated overnight in  
614 growth medium to facilitate plasmid transfer. The mixture was plated onto LB agar  
615 supplemented with 100 µg ml<sup>-1</sup> streptomycin (host selection) and 15 µg ml<sup>-1</sup> tetracycline  
616 (plasmid selection) to select for *E. coli* K-12 BW25113 str<sup>R</sup> host containing the pF plasmid.  
617 A single colony was selected and used to create an isogenic glycerol stock to be used as  
618 a representative isogenic *E. coli* transconjugant in this study, hereafter 'E<sub>T</sub>(pF)' where the  
619 T subscript is added to distinguish this strain from the plasmid-bearing *E. coli* E(pF) strain,  
620 which is susceptible to streptomycin.

621 The *Klebsiella pneumoniae* strain Kp08 from Jordt *et. al.* (9) was used as the  
622 ancestor for the *K. pneumoniae* strain in this study. Kp08 was grown overnight and plated  
623 onto LB agar supplemented with 30 µg ml<sup>-1</sup> nalidixic acid. A single nalidixic-acid-resistant  
624 colony was selected and used to create an isogenic glycerol stock, *K. pneumoniae* Kp08  
625 nal<sup>R</sup>. Kp08 nal<sup>R</sup> was mixed with E(pF) and incubated overnight in growth medium to  
626 facilitate plasmid transfer. The mixture was plated onto LB agar supplemented with 30 µg  
627 ml<sup>-1</sup> nalidixic acid (host selection) and 15 µg ml<sup>-1</sup> tetracycline (plasmid selection) to select  
628 for *K. pneumoniae* Kp08 nal<sup>R</sup> host containing the pF plasmid. A single colony was selected  
629 and used to create an isogenic glycerol stock to be used as the plasmid-containing *K.*  
630 *pneumoniae* donor in this study (hereafter 'K(pF)'). See Table F for a quick overview of  
631 the strains used in this study.

**Table F: The strains used in this study.** Antibiotic abbreviations are as follows: tet = tetracycline, str = streptomycin, and nal = nalidixic acid, and the 'R' superscript indicates drug resistance in the strain.

| Strain              | Host                                         | Plasmid               |
|---------------------|----------------------------------------------|-----------------------|
| E(pF)               | <i>E. coli</i> K-12 BW25113                  | F'42 tet <sup>R</sup> |
| K(pF)               | <i>K. pneumoniae</i> Kp08 nal <sup>R</sup>   | F'42 tet <sup>R</sup> |
| E(∅)                | <i>E. coli</i> K-12 BW25113 str <sup>R</sup> | None                  |
| E <sub>T</sub> (pF) | <i>E. coli</i> K-12 BW25113 str <sup>R</sup> | F'42 tet <sup>R</sup> |

632 Section 6b : Growth rate assays.

633  
634 The strains (Table F) were inoculated into LB medium from frozen glycerol stocks  
635 and grown overnight. The plasmid-containing cultures were supplemented with 15 µg ml<sup>-1</sup>  
636 tetracycline to select for maintenance of the plasmid. The saturated cultures were diluted  
637 100-fold into LB medium to initiate a second 24 hours of growth (in order to acclimate the  
638 previously frozen strains to laboratory conditions). The acclimated cultures were then  
639 diluted 10,000-fold into LB growth medium and dispersed into 27 wells in a deep-well  
640 microtiter plate at a volume of 100 µl per well. Every hour, 30 µl was removed from three  
641 wells to determine cell density via selective plating (Fig Ha). The three replicate plates  
642 were averaged to estimate the cell density at each hour. The growth rates were calculated  
643 by taking the slope of each neighboring time point using equation [1.12] (Fig Hb). Using  
644 the growth rate calculated over time, an incubation time was chosen that coincided with  
645 the population growing at or near the maximum growth rate for each strain to ensure  
646 bacterial cultures entered the phase of maximal or close to maximal growth rate before

647  
648  
649  
650

the start of the conjugation assay. Thus, the growth rate estimates over time were used solely for determining the pre-assay growth period before the conjugation assay is executed and not to calculate the LDM estimate itself. A pre-assay growth period of 4 hours was used for both donors, E(pF) and K(pF), and the recipient, E(∅).

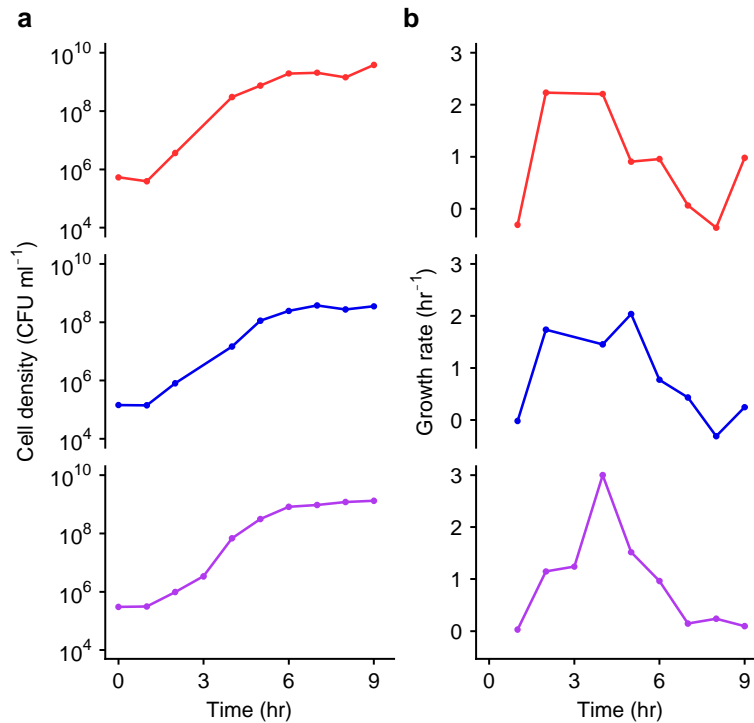

651  
652  
653  
654  
655  
656  
657  
658  
659  
660  
661  
662  
663  
664  
665  
666  
667  
668  
669  
670  
671  
672  
673  
674

**Fig H: The change in density and resulting growth rates of the relevant strains.** (a) Monocultures of K(pF), E(∅), and E(pF) (red, blue, and, purple, respectively) were tracked over 9 hours of growth via plating. Bars indicate the standard error of the mean of three replicate cultures, but the standard error was so small in all cases that it is not visible in the plot. Note that at 3 hours a data point is missing for both K(pF) and E(∅) due to plating error resulting in zero colonies and therefore no density estimate was available. (b) Using equation [1.12], the growth rates were calculated by taking the slope of a line connecting a focal point and the closest point earlier in time (in part a). This growth rate estimate is plotted at the focal point's time (in part b). The data and code needed to generate this figure can be found at <https://github.com/livkosterlitz/LDM> or <https://doi.org/10.5281/zenodo.6677158>.

*Section 6c : Minimum inhibitory concentration (MIC) assays.*

The strains (Table F) were grown from glycerol stocks with two overnight incubations as previously described in Section 6b. The acclimated cultures were diluted 100-fold into LB growth medium and dispersed into a column of wells in a deep-well plate at a volume of 500  $\mu$ l per well. Then 500  $\mu$ l of dual-antibiotic medium (streptomycin and tetracycline) was added to each well at increasing concentrations, forming a 2-fold gradient across the column. We note that the ratio of the two antibiotics was kept constant over the gradient. For each strain, this was repeated in three columns. After an overnight incubation, the well with the lowest concentration of the dual antibiotic medium across all replicates with no turbid growth was identified as the strain-specific MIC (Table G). The concentration chosen for the transconjugant-selecting medium must be above the donor



675  
676

and recipient MIC, but below the transconjugant MIC. For this study, we proceeded with 7.5  $\mu\text{g ml}^{-1}$  tet + 25  $\mu\text{g ml}^{-1}$  str.

**Table G: The dual-drug gradient MIC for the strains of interest.** The antibiotics used in the gradient were specific to the resistance profile of the transconjugant E<sub>T</sub>(pF); streptomycin (str) and tetracycline (tet). The MIC data was used to identify the antibiotic concentration for the transconjugant-selecting medium used in both conjugation assays; cross- and within-species.

| Strain              | Cell type      | Str and tet gradient MIC                                        |
|---------------------|----------------|-----------------------------------------------------------------|
| E(pF)               | Donor          | 1.88 $\mu\text{g ml}^{-1}$ tet + 6.25 $\mu\text{g ml}^{-1}$ str |
| K(pF)               | Donor          | 1.88 $\mu\text{g ml}^{-1}$ tet + 6.25 $\mu\text{g ml}^{-1}$ str |
| E( $\emptyset$ )    | Recipient      | 3.75 $\mu\text{g ml}^{-1}$ tet + 12.5 $\mu\text{g ml}^{-1}$ str |
| E <sub>T</sub> (pF) | Transconjugant | 15 $\mu\text{g ml}^{-1}$ tet + 50 $\mu\text{g ml}^{-1}$ str     |

677  
678

Section 6d : Extinction probability assays.

679

A key component of the LDM conjugation protocol is differentiating parallel donor-recipient co-cultures that contain transconjugants from those that do not. This is done by adding transconjugant-selecting medium prepared at antibiotic concentrations below the MIC of the transconjugant and above the MIC of the donor and recipient. Given the low numbers of transconjugants in the co-cultures, the results from a recent study of Alexander and MacLean (10) have high relevance. First, the authors show that levels of antibiotic below the MIC of the resistant strain are sufficient to decrease the chance of outgrowth with very low cell numbers (e.g., a single cell). In the context of our current study, if the concentration of antibiotics in the transconjugant-selecting medium is too high then co-cultures that contain transconjugants could produce a non-turbid culture because the transconjugant cell(s) fail to establish a lineage. Therefore, to avoid spurious non-turbid wells in the LDM protocol, the probability that a transconjugant cell fails to establish (the transconjugant extinction probability) should ideally be 0 in the transconjugant-selecting medium. Second, the authors show that the presence of a sufficiently dense sensitive cell population in the environment can decrease the extinction probability of the resistant type. In the context of our current study, the presence of donors and recipients in the cultures may decrease the transconjugant extinction probability. Overall, a non-zero transconjugant extinction probability could lead to a biased estimate of the conjugation rate; therefore, it needs to be explicitly checked.

698

Inspired by the approach of Alexander and MacLean, we developed a similar approach to estimate the extinction probability of a transconjugant cell. First, we assume that a transconjugant cell has zero probability of extinction in antibiotic-free medium. While this assumption may be misplaced, it provides a starting point, and may itself be checked if there are reasons to doubt it holds. Second, we assume that a transconjugant cell has a specific probability of extinction in transconjugant-selecting medium with certain antibiotic concentrations given by the variable  $x$ , which is denoted  $\pi_x$ . Third, we assume that the lineage from every transconjugant cell in a population goes extinct independently. Consider a population of transconjugants distributed into many subpopulations containing transconjugant-selecting medium such that the average number of cells per subpopulation is initially  $T$ . Assuming an initial Poisson distribution, the fraction of subpopulations that leave zero transconjugant descendants,  $P_x$  is:

709

710

$$P_x = \sum_{i=0}^{\infty} \frac{e^{-T} T^i}{i!} (\pi_x)^i = \frac{e^{-T}}{e^{-T\pi_x}} \sum_{i=0}^{\infty} \frac{e^{-T\pi_x}}{i!} (T\pi_x)^i = e^{-T(1-\pi_x)}.$$

711

By our assumption, when considering antibiotic-free medium, which we represent as  $x = 0$ , we have

712

713

$$P_0 = e^{-T(1-\pi_0)} = e^{-T}.$$

714

Thus, it is the case

715

716

$$T = -\ln P_0.$$

717

Given that

718

$$P_x = e^{\ln P_0(1-\pi_x)},$$

719

we have a form to calculate the extinction probability in the transconjugant-selecting medium in the laboratory

720

$$\pi_x = 1 - \frac{\ln P_x}{\ln P_0}, \quad [6.1]$$

721

where  $P_x$  is the fraction of non-turbid wells with transconjugant-selecting medium and  $P_0$  is the fraction of non-turbid wells with antibiotic-free medium.

722

723

In the laboratory, we used the protocol implemented by Alexander and MacLean to estimate  $\pi_x$  with a few adjustments. Briefly, the transconjugants were diluted ( $4 \times 10^7$  fold) and 50  $\mu\text{l}$  aliquots were dispensed into all wells in a deep-well microtiter plate. For the antibiotic-free condition, the wells were filled with LB medium to a final volume of 1 ml. For the transconjugant-selecting condition, the wells were filled with LB medium supplemented with transconjugant-selecting antibiotics ( $7.5 \mu\text{g ml}^{-1}$  tet +  $25 \mu\text{g ml}^{-1}$  str, see Section 6c for details) to a final volume of 1 ml. Both deep-well plates were incubated for 4 days. Using equation [6.1], we calculated a transconjugant extinction probability of 0.95 in the antibiotic concentration used for the transconjugant-selecting medium in this study.

724

725

726

727

728

729

730

731

732

733

Given that the extinction probability was non-negligible (i.e.,  $\pi_x > 0$ ), we ran a subsequent assay to estimate  $\pi_x$  in the presence of sensitive cells (donors and recipients) at approximately the final densities that occur when the transconjugant-selecting medium is added for both mating assays (cross- and within-species, see Table H) reported in this study. This provided a more accurate  $\pi_x$  for correcting the LDM estimate (see Section 7). In this experiment, the deep-well microtiter plates are prepared the same as above but supplemented with donor and recipient cells at the appropriate densities. As a result, we calculated mating-specific transconjugant extinction probabilities (Table H). These mating-specific transconjugant extinction probabilities (given in Table H) were used to correct the LDM estimate from each experimental replicate using equation [7.1].

734

735

736

737

738

739

740

741

742

Given the non-negligible extinction probability in the selective liquid medium, the extinction probability on the selective agar plates needed to be determined. We ran a subsequent assay to estimate  $\pi_x$  for the donor-, recipient-, and transconjugant-selecting agar plates. Briefly, the monocultures of each strain were diluted ( $10^{-5}$  and  $10^{-6}$ ) and plated onto antibiotic-free plates and the appropriate selecting plates. We used a slightly altered form for calculating the agar extinction probability

743

744

745

746

747

748

$$\pi_x = 1 - \frac{C_x}{C_0}, \quad [6.2]$$

749

where  $C_x$  is the number of colonies on the antibiotic-infused plate and  $C_0$  is the number of colonies on the antibiotic-free plate for the same diluted culture. Using equation [6.2], we calculated each strain's extinction probability (see Table I for the antibiotic concentration used in the selective agar plates in this study). These strain-specific extinction

750

751

752

753 probabilities were used to correct the density estimates from each experiment. We note  
 754 that correcting the density estimates for the 24-hour data in 3 out of the 6 experiments  
 755 resulted in negative estimates for the recipient density data. We can explain the negative  
 756 estimates as follows. Given the high transconjugant extinction probability on the  
 757 transconjugant-selecting agar plates (see Table I), the transconjugant density increases  
 758 after the correction. Indeed, the transconjugant population can become more common  
 759 than the “estimated” recipient population. We say “estimated” because there are no agar  
 760 plates that select *only* for recipient cells. Specifically, the “recipient-selecting” agar plates  
 761 allow for both recipient and transconjugant growth. To determine the recipient density, we  
 762 subtract the transconjugant density from the density of cells calculated from the “recipient-  
 763 selecting” agar plate counts. When the transconjugants are more abundant than—or at  
 764 relatively similar densities to—recipients, the exact recipient density cannot be  
 765 determined due to its relative scarcity. Specifically, the subtractive plating scheme could  
 766 result in a negative value. We note that this happens rarely given that transconjugant  
 767 densities are typically orders of magnitude lower than recipients. In the cases of high  
 768 conjugation rates and long incubation times, this issue is more likely to arise. If the  
 769 recipient density went negative after subtraction, then the non-subtracted recipient  
 770 density was used instead. An overestimate for recipient density leads to an underestimate  
 771 for the SIM estimate at 24 hours; therefore, the differences between the cross-species  
 772 LDM and SIM estimates shown in Fig 6 are conservative.

773 This section highlights the importance of non-zero extinction probabilities in  
 774 selective conditions in the laboratory. Therefore, the extinction probabilities in selective  
 775 liquid-medium and selective-agar plates need to be explicitly checked. If the extinction  
 776 probabilities are indistinguishable from zero in each selective condition used, then the  
 777 user can proceed, and no adjustments are necessary. However, a non-zero extinction  
 778 probability is likely and can be a source of bias if not considered. We recommend two  
 779 solutions. The first is to find a selection condition where the extinction probability is  
 780 indistinguishable from zero. This option leans on the result from the Alexander and  
 781 MacLean study which shows that the antibiotic concentration being sufficiently below the  
 782 MIC of the focal strain can lower the extinction probability to a point that is  
 783 indistinguishable from zero. We recognize that this solution may not be possible. For  
 784 instance, the donor and recipient MIC for the transconjugant-selecting condition may be  
 785 too close to the transconjugant MIC, such that there are no antibiotic concentrations that  
 786 yield a zero transconjugant extinction probability and still counterselect donors and  
 787 recipients. In this case, the user would proceed with the second solution where the  
 788 extinction probabilities are used to compute a corrected estimate. This second solution  
 789 was used in this study (see Section 7).

**Table H: Mating-specific transconjugant extinction probabilities with transconjugant-selecting liquid medium.** The donor and recipient densities were estimated using selective plating and were close to the final densities in the LDM conjugation protocol. Transconjugant-selective medium was prepared at the concentration used throughout the study ( $7.5 \mu\text{g ml}^{-1}$  tet +  $25 \mu\text{g ml}^{-1}$  str).

| Mating                                      | Donor density   | Recipient density | $\pi_x$ |
|---------------------------------------------|-----------------|-------------------|---------|
| within-species<br>E(pF) to E( $\emptyset$ ) | $5 \times 10^4$ | $2 \times 10^4$   | 0.95    |
| cross-species<br>K(pF) to E( $\emptyset$ )  | $1 \times 10^8$ | $7 \times 10^6$   | 0.93    |

**Table I: Strain-specific extinction probabilities with selective-agar plates.** Donor-, recipient-, and transconjugant-selective plates were prepared at concentrations that were used throughout the study ( $7.5 \mu\text{g ml}^{-1}$  tet,  $25 \mu\text{g ml}^{-1}$  str, and  $7.5 \mu\text{g ml}^{-1}$  tet +  $25 \mu\text{g ml}^{-1}$  str, respectively).

| Strain           | Selective-plate type | $\pi_x$ |
|------------------|----------------------|---------|
| E(pF)            | Donor                | 0.30    |
| K(pF)            | Donor                | 0.21    |
| E( $\emptyset$ ) | Recipient            | 0.55    |
| E $\tau$ (pF)    | Transconjugant       | 0.99    |

790 Section 6e : Choosing an incubation time and initial density for executing the  
 791 LDM conjugation assay.  
 792

793 To find an incubation time and initial densities for executing the LDM protocol, all  
 794 strains (Table F) were prepared using the procedure in Section 6b. We mixed  
 795 exponentially growing donors and recipients in a large array of parallel co-cultures for a  
 796 full factorial treatment of three initial densities and four incubation times (Fig 1a). We note  
 797 that the resolution of initial densities and incubation times can be adjusted as needed.  
 798 This is particularly useful if the conjugation rate is completely unknown. Alternatively,  
 799 there could be good reasons for longer incubation times such as slow growth rates. For  
 800 ease of explanation, we illustrate the protocol with a concrete example. Four columns  
 801 were used for each initial density ( $10^4$ ,  $10^5$ , and  $10^6$  cells per ml) where 2 rows were used  
 802 for each incubation time (0, 1, 2, and 3 hours) resulting in 8 wells per density-time  
 803 treatment. For each dilution, the exponentially growing donor and recipient cultures were  
 804 diluted by the specific factor, mixed at equal volumes, and dispensed into the wells in the  
 805 corresponding four columns at a volume of  $100 \mu\text{l}$  per well (Fig 1a, black-bordered wells).  
 806 At each incubation time,  $900 \mu\text{l}$  of transconjugant-selecting medium ( $7.5 \mu\text{g ml}^{-1}$   
 807 tetracycline and  $25 \mu\text{g ml}^{-1}$  streptomycin; see Section 6c and 6d) was added to each well  
 808 in the corresponding two rows (Fig 1b, yellow-background). After the last time point ( $t = 3$   
 809 hours), the deep-well plate was incubated for 4 days. After the long incubation, we  
 810 assessed the co-cultures within each time-density treatment for presence or absence of  
 811 transconjugants by recording the turbidity (4 columns x 2 rows = 8 wells; Fig 1c). There  
 812 were three outcomes possible for each time-density treatment: none of the co-cultures  
 813 have transconjugants (gray-filled dot), all co-cultures have transconjugants (purple-filled  
 814 dot), or there is both transconjugant-containing and transconjugant-free co-cultures (light-  
 815 purple dot). The goal is to identify a density-time combination with the last outcome (i.e.,  
 816 both turbid and non-turbid co-cultures). These treatments meet the  $\hat{p}_0(\tilde{t})$  condition (i.e.,  
 817  $0 < \hat{p}_0(\tilde{t}) < 1$ ). As a general expectation, a high donor conjugation rate ( $\gamma_D$ ) will require  
 818 shorter incubation times than a lower rate for a given initial density. For our matings  
 819 (within- and cross-species), we found multiple density-time combinations that met the  
 820  $\hat{p}_0(\tilde{t})$  condition. For the within-species mating assay, we chose a  $10^3$ -fold dilution and an  
 821 incubation time of 1 hour and 15 minutes. For the cross-species mating assay, we chose  
 822 the  $10^3$ -dilution and a 4-hour incubation time.

823 Even though multiple density-time treatments met the  $\hat{p}_0(\tilde{t})$  condition, the final  
 824 choice could not be made without the information from the controls. Thus, an additional  
 825 deep-well plate was created (Fig 1d) to accompany the density-time plate containing the  
 826 co-cultures (Fig 1a). This deep-well plate had the same factorial layout for densities (four

827 columns) and incubation times (two rows) except the 8 wells within each treatment are  
828 not exclusively co-cultures. 3 of the wells contained monocultures of the three strains.  
829 Specifically, 100  $\mu$ l of donor, recipient and transconjugant cultures were each placed in  
830 their own well (Fig 1d red-, blue- and purple-bordered wells). At a later point in the assay,  
831 these monocultures allowed us to determine that transconjugant-selecting medium  
832 prohibited growth of both donors and recipients, while permitting growth of  
833 transconjugants at each density-time treatment. An additional 2 wells contained  
834 monocultures of donors and recipients which are used to create a co-culture (in an empty  
835 well, dash-bordered well) during the assay itself at each incubation time (for each initial  
836 density). An additional 2 wells contained 100  $\mu$ l of donor-recipient co-cultures which were  
837 used for selective plating to verify that the donors and recipients maintain a constant  
838 growth rate. At each incubation time, three events occurred in rapid succession. First, 30  
839  $\mu$ l was removed from each of the wells used to determine densities via selective plating.  
840 Second, donor and recipient monocultures were mixed at equal volumes into the empty  
841 well (Fig 1d, indicated by the gray arrows). Importantly, this well served as a control to  
842 verify that new transconjugant cells did not form via conjugation after transconjugant-  
843 selecting medium was added. Third, 900  $\mu$ l of transconjugant-selecting medium was  
844 added to the first row of wells at the relevant time point (yellow background). The deep-  
845 well plate was incubated for 4 days. For the density-time combinations chosen, the control  
846 wells verified that the transconjugant-selecting medium operated as expected. In addition,  
847 the selective plating indicated the conditions under which the donors and recipients  
848 maintained constant growth.

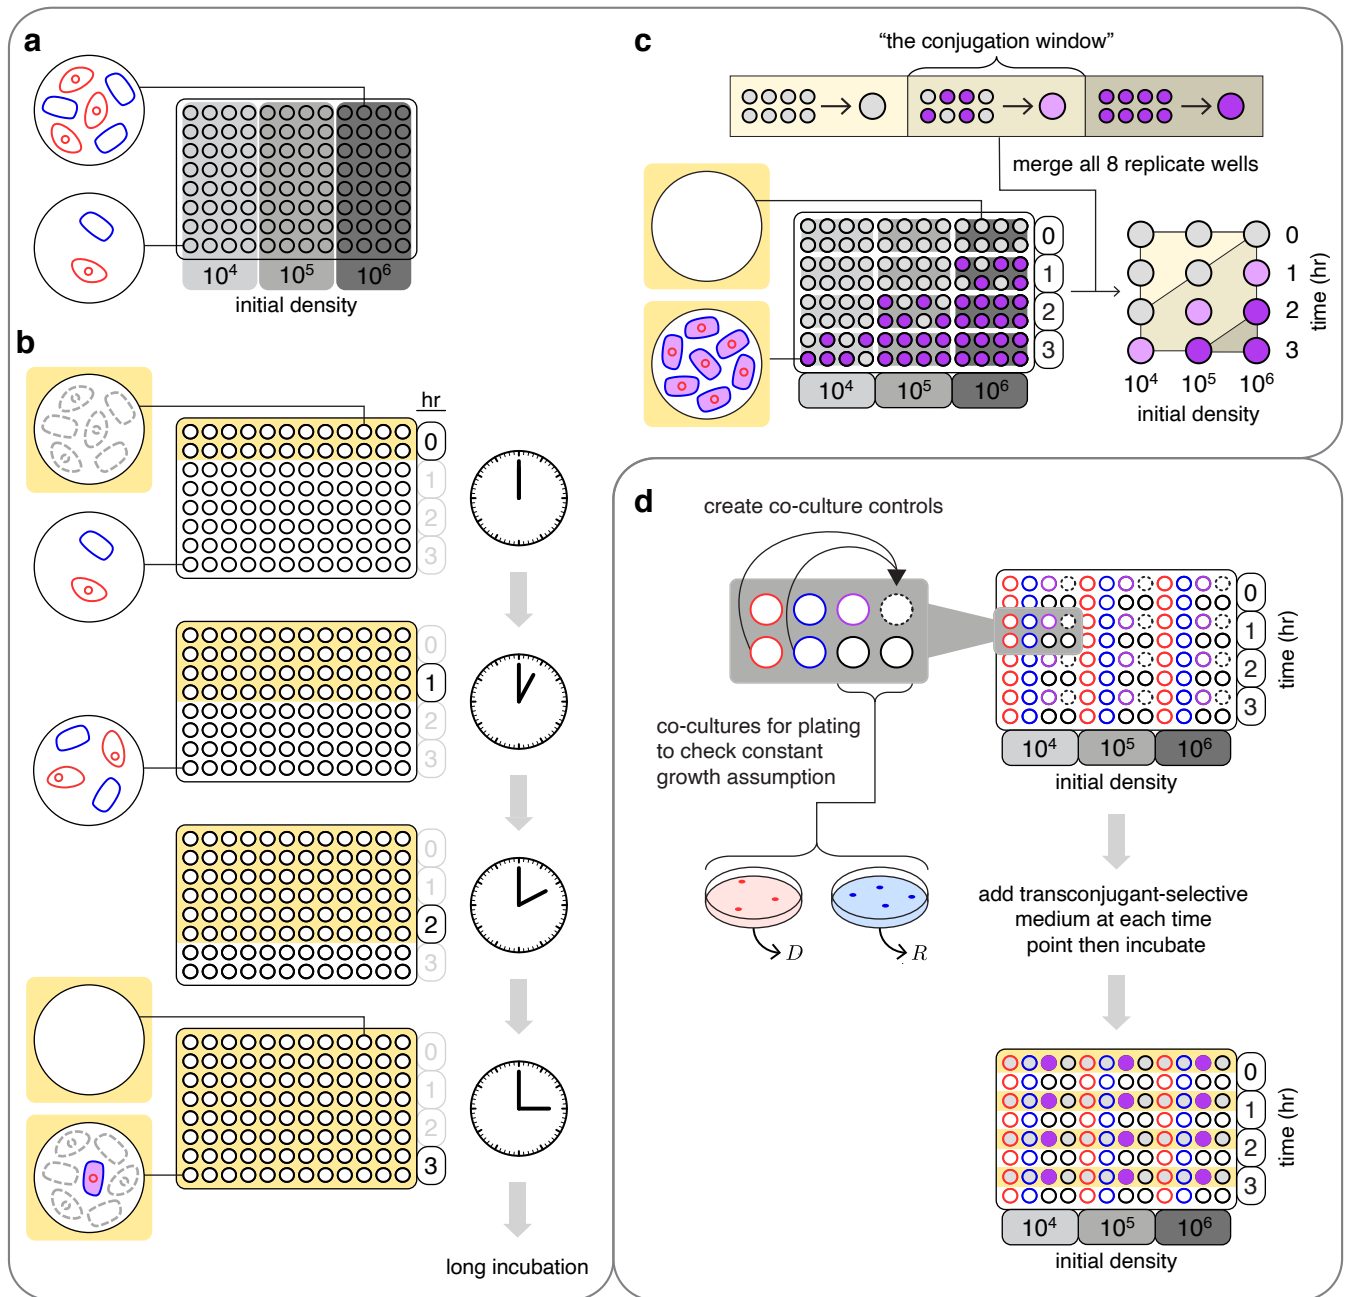

849 **Fig I: Overview for finding an incubation time and initial densities for executing the**  
 850 **LDM.** (a) the microtiter plate map designating the placement of the co-cultures over 10-  
 851 fold increases in initial densities (different shades of gray). For simplicity, donors and  
 852 recipients are at the same proportion in each co-culture. (b) Using the microtiter plate  
 853 from part a, transconjugant-selecting medium (yellow-background) is added at each time  
 854 designated by two rows in the microtiter plate. Two example wells from different density-  
 855 time combinations are highlighted on the left. In the top example well, transconjugant-  
 856 selecting medium is added immediately, inhibiting growth of donor and recipient cells  
 857 (grey dashed cells), and resulting in a non-turbid well as no transconjugants formed. In  
 858 the bottom example well, the donor and recipient population in the co-culture grow until  
 859 transconjugant-selecting medium is added at 3-hours, inhibiting growth of donors and  
 860 recipients, and permitting growth of the formed transconjugants. (c) After a lengthy  
 861 incubation of the microtiter plate from part b, there are two well-types in the microtiter  
 862 plate (bottom-left): transconjugant-containing (purple-filled) and transconjugant-free  
 863 (gray-filled). For each density-time treatment, the 8 mating wells are considered as a

864 group resulting in one of three outcomes (top): all transconjugant-free wells (gray dot), all  
865 transconjugant-containing wells (purple dot), a proportion of both well types (light-purple  
866 dot). Any treatment with a light-purple dot represents a viable combination of initial  
867 densities ( $D'_0$  and  $R'_0$ ) and incubation time ( $\tilde{t}'$ ). (d) The microtiter plate with the control  
868 wells is set up with the same factorial layout used in part a except the 8 wells in each  
869 density-time treatment are not all co-cultures (black-bordered circles). Donor, recipient,  
870 and transconjugant monocultures serve as controls (red-, blue-, and purple-bordered  
871 wells, respectively). For the empty well (dash-bordered circles), donor and recipient  
872 monocultures are mixed into the empty well (indicated by grey arrows) to create a co-  
873 culture control at each time point to verify that diluting with transconjugant-selecting  
874 medium effectively prevents conjugation. In addition, the co-cultures are sampled at each  
875 time point to uncover densities and determine whether donors and recipients maintain  
876 constant growth. Subsequently, transconjugant-selecting medium is added to the  
877 microtiter plate at the same times as the microtiter plate in part a. The control wells  
878 inoculated with transconjugants should be turbid (purple-filled) while the monocultures  
879 with donors and recipients should be non-turbid. In addition, the co-cultures created at  
880 each time point for the different initial density treatments should be non-turbid.

881

## 882 **Section 7 : Probability generating function, low-order moments, and failure to** 883 **establish**

884

885 The aim of the first part of this section is to explore the connection between mutation and  
886 conjugation processes further. In the second part of this section, we derive a general  
887 expression for the LDM estimate that incorporates cases when the transconjugant doesn't  
888 always establish a successful lineage (i.e., non-zero extinction probability).

889

890 Keller and Antal (11) studied a generalization of the process explored by Luria and  
891 Delbrück (12). To start, Keller and Antal consider a wildtype population expanding from a  
892 single cell as follows:

893

$$N_t = f(t) = e^{\delta t}.$$

894

895 Each wildtype cell generates a mutant cell at a rate  $\nu'$ , which grows as a stochastic birth  
896 process with rate  $\alpha$  (Keller and Antal studied a supercritical birth-death process, but we  
897 will focus on the special case of a pure birth process). In this case, mutants form at a rate  
898  $\nu'f(t)$ , such that the times of mutant arrival conform to a non-homogeneous Poisson  
899 process. We note that if we start with  $N_0$  cells, then mutants form at a rate  $N_0\nu'f(t)$ .  
900 Alternatively, we can set  $\nu = N_0\nu'$ , such that mutants form at a rate  $\nu f(t)$ , which is the  
901 case explored by Keller and Antal.

901

902 Keller and Antal derive the probability generating function for the total number of mutants  
903 at an arbitrary time:

904

$$G(z, t) = \exp \left\{ \frac{\nu}{\delta} \left( F \left( 1, \kappa; 1 + \kappa; \frac{z}{z-1} e^{-\alpha t} \right) - e^{\delta t} F \left( 1, \kappa; 1 + \kappa; \frac{z}{z-1} \right) \right) \right\},$$

905

905 where  $F$  is the Gaussian hypergeometric function and  $\kappa = \frac{\delta}{\alpha}$ .

906

907 Our process of interest (the formation and growth of transconjugants) can be seen as an  
908 instance of their formulation by making the following substitutions:

909

$$\delta = \psi_D + \psi_R,$$

910

$$\nu = \gamma_D D_0 R_0,$$

911

$$\alpha = \psi_T.$$

912 With these substitutions, the generating function becomes:

$$913 \quad G(z, t) = \exp \left\{ \frac{\gamma_D D_0 R_0}{\psi_D + \psi_R} \left( F \left( 1, \frac{\psi_D + \psi_R}{\psi_T}; 1 + \frac{\psi_D + \psi_R}{\psi_T}; \frac{z}{z-1} e^{-\psi_T t} \right) \right. \right. \\ 914 \quad \left. \left. - e^{(\psi_D + \psi_R)t} F \left( 1, \frac{\psi_D + \psi_R}{\psi_T}; 1 + \frac{\psi_D + \psi_R}{\psi_T}; \frac{z}{z-1} \right) \right) \right\}.$$

915 Because

$$916 \quad G(z, t) = \sum_{n=0}^{\infty} p_n(t) z^n,$$

917 the probability of zero transconjugants now becomes straightforward (given  
918  $F \left( 1, \frac{\psi_D + \psi_R}{\psi_T}; 1 + \frac{\psi_D + \psi_R}{\psi_T}; 0 \right) = 1$ ):

$$919 \quad p_0(t) = G(0, t) = \exp \left\{ \frac{-\gamma_D D_0 R_0}{\psi_D + \psi_R} (e^{(\psi_D + \psi_R)t} - 1) \right\},$$

920 which agrees with the result from Section 2.

921

922 Making the appropriate substitutions, we can also write the mean and variance (eqs. 8  
923 and 9 from Keller and Antal) for the transconjugants:

924

$$925 \quad E[T_t] = \begin{cases} \gamma_D D_0 R_0 e^{(\psi_D + \psi_R)t} & \text{if } \psi_D + \psi_R = \psi_T \\ \frac{\gamma_D D_0 R_0 (e^{(\psi_D + \psi_R)t} - e^{\psi_T t})}{\psi_D + \psi_R - \psi_T} & \text{if } \psi_D + \psi_R \neq \psi_T \end{cases}$$

926  $\text{Var}[T_t]$

$$\begin{aligned} & \frac{2\gamma_D D_0 R_0 (e^{2(\psi_D + \psi_R)t} - e^{(\psi_D + \psi_R)t})}{\psi_D + \psi_R} - \gamma_D D_0 R_0 e^{(\psi_D + \psi_R)t} && \text{if } \psi_D + \psi_R = \psi_T \\ 927 \quad & = \frac{2\gamma_D D_0 R_0 (e^{(\psi_D + \psi_R)t/2} - e^{(\psi_D + \psi_R)t})}{\psi_D + \psi_R} + 2\gamma_D D_0 R_0 e^{(\psi_D + \psi_R)t} && \text{if } \psi_D + \psi_R = 2\psi_T \\ & \left\{ \gamma_D D_0 R_0 \frac{2e^{2\psi_T t} (\psi_T - (\psi_D + \psi_R)) - e^{\psi_T t} (2\psi_T - (\psi_D + \psi_R)) + (\psi_D + \psi_R) e^{(\psi_D + \psi_R)t}}{(2\psi_T - (\psi_D + \psi_R))(\psi_T - (\psi_D + \psi_R))} \right\} && \text{otherwise} \end{aligned}$$

928 We provide derivations for these expressions in GitHub Appendix VI. In all cases, the  
929 variance grows relative to the mean over time (see GitHub Appendix VII for the  
930 derivations).

931

932 In our experiment, at time  $\tilde{t}$ , medium selecting for transconjugants is added to every  
933 mating culture. If every transconjugant always establishes a successful lineage, then  
934 every mating culture with one or more transconjugant cells at time  $\tilde{t}$  will produce a turbid  
935 culture after a lengthy incubation. A more realistic scenario would be to assume that every  
936 transconjugant cell fails to establish a lineage with some probability, which we call  $\pi$ . If  
937 failure to establish occurs independently for each transconjugant, then the probability of  
938 a non-turbid culture after incubation ( $P_{\text{nt}}$ ) when selective medium was added at time  $\tilde{t}$  is:

$$939 \quad P_{\text{nt}} = \sum_{n=0}^{\infty} p_n(\tilde{t}) \pi^n.$$

940 However, this is equivalent to an appropriate evaluation of the generating function:

$$941 \quad P_{\text{nt}} = G(\pi, \tilde{t}).$$

942 This can be rewritten as



943

$$P_{nt} = \exp \left\{ \frac{\gamma_D D_0 R_0}{\psi_D + \psi_R} \left( F \left( 1, \frac{\psi_D + \psi_R}{\psi_T}; 1 + \frac{\psi_D + \psi_R}{\psi_T}; \frac{\pi}{\pi - 1} e^{-\psi_T \tilde{t}} \right) - e^{(\psi_D + \psi_R) \tilde{t}} F \left( 1, \frac{\psi_D + \psi_R}{\psi_T}; 1 + \frac{\psi_D + \psi_R}{\psi_T}; \frac{\pi}{\pi - 1} \right) \right) \right\}.$$

944

945 Solving for  $\gamma_D$  yields

946

947

$$\gamma_D = \frac{-\ln(P_{nt})(\psi_D + \psi_R)}{D_0 R_0} \left( e^{(\psi_D + \psi_R) \tilde{t}} F \left( 1, \frac{\psi_D + \psi_R}{\psi_T}; 1 + \frac{\psi_D + \psi_R}{\psi_T}; \frac{\pi}{\pi - 1} \right) - F \left( 1, \frac{\psi_D + \psi_R}{\psi_T}; 1 + \frac{\psi_D + \psi_R}{\psi_T}; \frac{\pi}{\pi - 1} e^{-\psi_T \tilde{t}} \right) \right)^{-1}$$

948

949

950

951

952

If the values of  $D_0$  and  $R_0$  are not the total initial numbers, but cell densities (cfu/ml) in some volume for the mating culture (such that there are  $f$  experimental volumes per ml) and we wish to measure conjugation rate in units ml/(h · cfu), then must add a correction factor (see Section 5), yielding

$$\gamma_D = f \frac{-\ln(P_{nt})(\psi_D + \psi_R)}{D_0 R_0} \left( e^{(\psi_D + \psi_R) \tilde{t}} F \left( 1, \frac{\psi_D + \psi_R}{\psi_T}; 1 + \frac{\psi_D + \psi_R}{\psi_T}; \frac{\pi}{\pi - 1} \right) - F \left( 1, \frac{\psi_D + \psi_R}{\psi_T}; 1 + \frac{\psi_D + \psi_R}{\psi_T}; \frac{\pi}{\pi - 1} e^{-\psi_T \tilde{t}} \right) \right)^{-1} \quad [7.1]$$

953

954

First of all, we note that if every transconjugant establishes a lineage (i.e.,  $\pi = 0$ ), then  $P_{nt} = p_0(\tilde{t})$  and equation [7.1] reduces to

955

$$\gamma_D = f \frac{-\ln(p_0(\tilde{t}))(\psi_D + \psi_R)}{D_0 R_0 (e^{(\psi_D + \psi_R) \tilde{t}} - 1)},$$

956

which, using the maximum likelihood estimate for  $p_0(\tilde{t})$ , can be rewritten as

957

$$\gamma_D = f \left\{ \frac{1}{\tilde{t}} [-\ln \hat{p}_0(\tilde{t})] \frac{\ln D_{\tilde{t}} R_{\tilde{t}} - \ln D_0 R_0}{D_{\tilde{t}} R_{\tilde{t}} - D_0 R_0} \right\},$$

958

and this is simply equation [13].

959

960

961

962

963

964

965

966

However, equation [7.1] is the more general expression. In Section 6d, we discuss a method for estimating  $\pi$ . The maximum likelihood estimate for  $P_{nt}$  is the fraction of empty wells in the LDM protocol. Before, we called this  $\hat{p}_0(\tilde{t})$ , however, when there is positive probability that a transconjugant cell fails to establish (i.e.,  $\pi > 0$ ), then generally  $P_{nt} > p_0(\tilde{t})$ . Thus, we will denote the maximum likelihood estimate as  $\hat{P}_{nt}$  (the fraction of non-turbid wells).

967

968

969

If we let the density of transconjugants in a monoculture at times 0 and  $\tilde{t}$  be  $T_0^m$  and  $T_{\tilde{t}}^m$ , respectively (see Section 6b) the following is the more general conjugation rate estimate (where all growth rates have been converted into estimated densities):

$$\gamma_D = f \frac{-\ln(\hat{P}_{nt})\zeta}{\tilde{t}} \left( D_{\tilde{t}} R_{\tilde{t}} F \left( 1, \kappa; 1 + \kappa; \frac{\pi}{\pi - 1} \right) - D_0 R_0 F \left( 1, \kappa; 1 + \kappa; \frac{\pi}{\pi - 1} \frac{T_0^m}{T_{\tilde{t}}^m} \right) \right)^{-1} \quad [7.2]$$

970 with

$$\varsigma = \ln D_{\bar{t}} R_{\bar{t}} - \ln D_0 R_0,$$

971  
972 and

$$\kappa = \frac{\varsigma}{\ln T_{\bar{t}}^m - \ln T_0^m} = \frac{\ln D_{\bar{t}} R_{\bar{t}} - \ln D_0 R_0}{\ln T_{\bar{t}}^m - \ln T_0^m}.$$

974

### 975 **Section 8 : Variance in Estimates**

976 Here we will focus on two estimates, ASM and LDM, and ask about their variance  
977 (enabling us to compare precision). We will focus exclusively on the contributions to this  
978 variance coming from the stochasticity in the transconjugant numbers (i.e., ignoring  
979 contributions coming from assessment of initial and final donor and recipient populations).  
980 Details on some of the derivations in this section are given in Github Appendix VII.

981

982 We start with the ASM estimate (here we express the estimate in terms of growth rate  
983 parameters):

$$984 \gamma_D = \frac{\psi_D + \psi_R - \psi_T}{D_0 R_0 (e^{(\psi_D + \psi_R)\bar{t}} - e^{\psi_T \bar{t}})} T_{\bar{t}}.$$

985 Because we are only focusing on the contribution of the transconjugant variation, all  
986 parameters (initial densities and growth rates will be taken to be fixed). Thus, we can think  
987 about the ASM estimate as a random variable  $\Gamma_{ASM}$ , where

$$988 \Gamma_{ASM} = c_1 T_{\bar{t}},$$

989 where the constant  $c_1$  is

$$990 c_1 = \frac{\psi_D + \psi_R - \psi_T}{D_0 R_0 (e^{(\psi_D + \psi_R)\bar{t}} - e^{\psi_T \bar{t}})}.$$

991 The variance of the ASM estimate is then

$$992 \text{var}(\Gamma_{ASM}) = c_1^2 \{\text{var}(T_{\bar{t}})\}.$$

993 But we have a closed form expression for  $\text{var}(T_{\bar{t}})$ . If  $\psi_T \notin \{\psi_D + \psi_R, (\psi_D + \psi_R)/2\}$ , we  
994 have

995  $\text{var}(\Gamma_{ASM})$

$$996 = \frac{\gamma_D (\psi_D + \psi_R - \psi_T)}{D_0 R_0} \left\{ \frac{(\psi_D + \psi_R) e^{(\psi_D + \psi_R)\bar{t}} + (\psi_D + \psi_R - 2\psi_T) e^{\psi_T \bar{t}} - (\psi_D + \psi_R - \psi_T) 2e^{2\psi_T \bar{t}}}{(\psi_D + \psi_R - 2\psi_T) (e^{(\psi_D + \psi_R)\bar{t}} - e^{\psi_T \bar{t}})^2} \right\}.$$

997 The formulas for  $\psi_T = \psi_D + \psi_R$  and  $2\psi_T = \psi_D + \psi_R$  could also be derived via simple  
998 substitution (note,  $\lim_{\psi_T \rightarrow \psi_D + \psi_R} c_1 = 1/(D_0 R_0 t e^{(\psi_D + \psi_R)\bar{t}})$ ). These formulas allow us to project

999 variance in the ASM estimate over time due to transconjugant variation if all parameters  
1000 are known.

1001

1002 We now turn to the LDM estimate:

$$1003 \gamma_D = -\ln \hat{p}_0(\bar{t}) \left( \frac{\psi_D + \psi_R}{D_0 R_0 (e^{(\psi_D + \psi_R)\bar{t}} - 1)} \right).$$

1004 What we actually measure is the number of populations (or wells) that have no  
1005 transconjugants (call this  $w$ ) out of the total number of populations (or wells) tracked (call  
1006 this  $W$ ). As we show in Github Appendix IV, the maximum likelihood estimate of  $p_0(\bar{t})$  is

$$1007 \hat{p}_0(\bar{t}) = \frac{w}{W}.$$

1008 Of course, from experiment to experiment, there will be variance in the number of  
1009 populations with no transconjugants. Let us consider a random variable  $F$ , which  
1010 represents the fraction of total populations that have no transconjugants. The expectation  
1011 of  $F$  is (we drop the time argument for notational convenience):

$$E[F] = p_0.$$

The second central moment of  $F$  is

$$\text{var}[F] = \frac{p_0(1-p_0)}{W}.$$

Because we are only focusing on the contribution of the transconjugant variation, all parameters (initial densities and growth rates will be taken to be fixed). Thus, we can think about the LDM estimate as a random variable  $\Gamma_{\text{LDM}}$ ,

$$\Gamma_{\text{LDM}} = c_2 \ln F,$$

where the constant  $c_2$  is

$$c_2 = -\left(\frac{\psi_D + \psi_R}{D_0 R_0 (e^{(\psi_D + \psi_R)\tilde{t}} - 1)}\right).$$

The variance of the LDM estimate is then

$$\text{var}(\Gamma_{\text{LDM}}) = c_2^2 \{\text{var}(\ln F)\}.$$

Here we use a first-order Taylor series approximation for  $\ln F$  centered at  $E[F]$ :

$$\ln F \approx \frac{F}{E[F]} + \ln(E[F]) - 1.$$

And we have

$$\text{var}[\ln F] \approx \frac{1}{W} \left(\frac{1}{p_0} - 1\right).$$

This approximation will be accurate when the deviation between  $F$  and  $E[F]$  is very small (i.e.,  $\frac{|F-E[F]|}{E[F]} \ll 1$ ). As  $W$  (the number of replicate populations in the experiment) gets large, the distribution of  $F$  will tighten around  $E[F]$ , making the approximation more reasonable.

Now, we have the following expression for  $p_0$  (reintroducing the time argument):

$$p_0(\tilde{t}) = \exp\left\{\frac{-\gamma_D D_0 R_0}{\psi_D + \psi_R} (e^{(\psi_D + \psi_R)\tilde{t}} - 1)\right\}.$$

Therefore,

$$\text{var}[\ln F_{\tilde{t}}] \approx \frac{1}{W} \left(\exp\left\{\frac{\gamma_D D_0 R_0}{\psi_D + \psi_R} (e^{(\psi_D + \psi_R)\tilde{t}} - 1)\right\} - 1\right),$$

where we make the time dependence of  $F$  clear. Returning to the variance for the LDM estimate,

$$\text{var}(\Gamma_{\text{LDM}}) \approx \frac{1}{W} \left(\frac{\psi_D + \psi_R}{D_0 R_0 (e^{(\psi_D + \psi_R)\tilde{t}} - 1)}\right)^2 \left(\exp\left\{\frac{\gamma_D D_0 R_0}{\psi_D + \psi_R} (e^{(\psi_D + \psi_R)\tilde{t}} - 1)\right\} - 1\right).$$

If we define

$$\xi_{\tilde{t}} = \frac{\psi_D + \psi_R}{D_0 R_0 (e^{(\psi_D + \psi_R)\tilde{t}} - 1)},$$

then we have

$$\text{var}(\Gamma_{\text{LDM}}) \approx \frac{\xi_{\tilde{t}}^2}{W} \left(e^{\left(\frac{\gamma_D}{\xi_{\tilde{t}}}\right)\tilde{t}} - 1\right).$$

In Fig J, we explore the variances (approximate in the case of LDM) as a function of time. The LDM estimates (for two different numbers of populations) are more precise (lower variance) for much of the time range. However, if the time gets too high ( $\tilde{t} \approx 5$  for the parameter set shown in Fig J), then the LDM variance blows up (while the ASM variance remains very low). In a case like this, the LDM is predicted to be more precise when the

1050  
1051  
1052  
1053

time of the assay is sufficiently low. In GitHub Appendix VII, we demonstrate this precision advantage for the LDM estimate mathematically. Also in GitHub Appendix VII, we derive an approximation for the variance for the SIM estimate, which demonstrates that the variances for the SIM and ASM estimates are extremely similar.

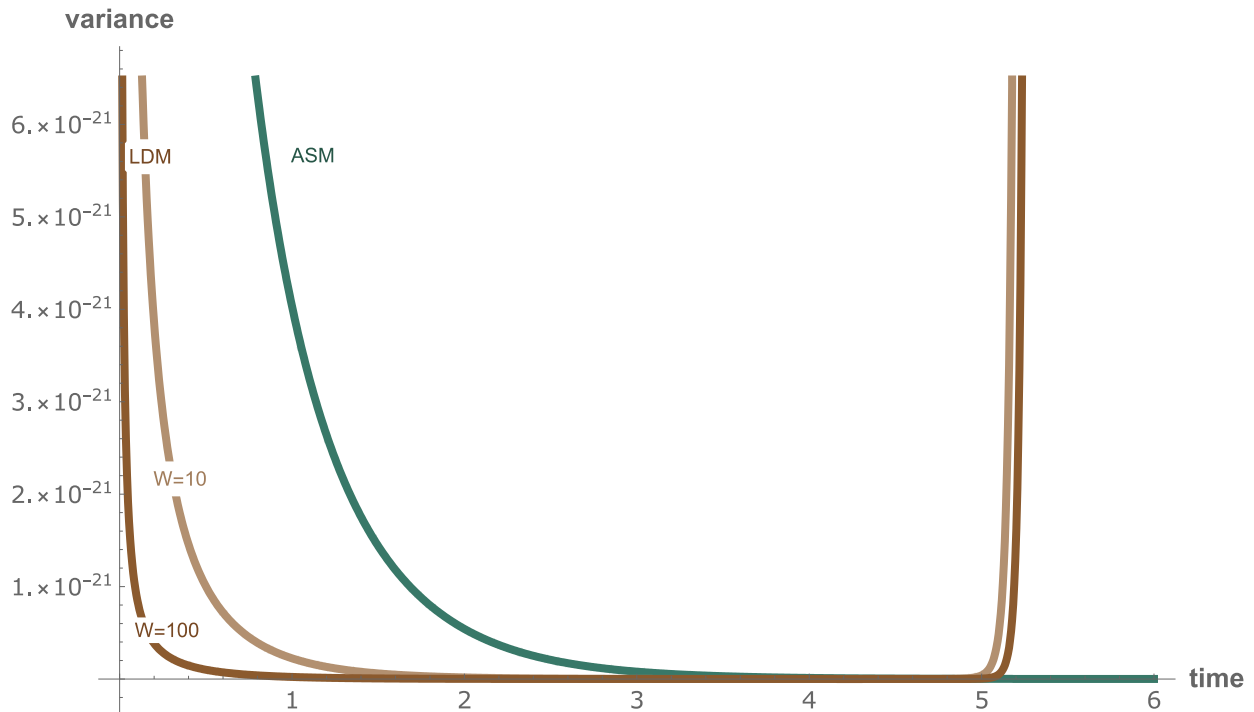

1054  
1055  
1056  
1057

**Fig J : The variance of the ASM (green) and LDM (brown) estimates.** Different numbers of populations ( $W$ ) are used for the LDM estimates, as indicated. The parameters used here are  $\gamma_D = 10^{-12}$ ,  $D_0 = R_0 = 10^4$ ,  $\psi_D = 1$ , and  $\psi_R = \psi_T = 1.5$ .

1058  
1059  
1060  
1061

As illustrated in Fig J, the variance in the LDM estimate changes with the number of populations ( $W$ ). How does this number affect the variance in the LDM estimate? Here we use simulations to further explore this question. In Fig Ka, we present the variance of LDM estimates as a function of incubation time ( $\hat{t}$ ) and the number of populations ( $W$ ). Generally, as the number of populations decreases or as the boundaries of the time interval are approached (where nearly none or all of the populations have transconjugants) the variance in the LDM estimate rises. The exception seems to be for times that are very long, but the low variance is likely a result of having many infinite estimates that are not included in the estimate variance (Fig Kb). Both infinite estimates (Fig Kb) and zero estimates (Fig Kc) are more likely as the number of populations decreases; in other words, the interval of incubation times producing non-zero finite estimates increases with the number of populations. Generally, the greater the number of populations and the more intermediate the incubation time (e.g., where approximately half of the populations have transconjugants), the lower the variance.

1062  
1063  
1064  
1065

1066  
1067  
1068  
1069

1070  
1071  
1072

1073  
1074  
1075  
1076

1077  
1078  
1079

Suppose an experimenter is considering some number of wells (populations) and wants to decide how many estimates to produce. For instance, with 500 wells, the experimenter could decide to run a single LDM assay and obtain a single estimate (with  $W = 500$ ) or perhaps instead could run 5 assays (with  $W = 100$ ), 10 assays (with  $W = 50$ ), 50 assays (with  $W = 10$ ) or 100 assays (with  $W = 5$ ) for 5, 10, 50, and 100 estimates, respectively. Does it make a difference to the precision or accuracy to split or lump wells? Here we explore this question through simulation. How do we compare different partitions of wells?

Let us consider some total number of wells, call this  $W^*$ , and consider some factor of  $W^*$ , which we will call  $W'$ ; i.e.,  $W^*/W' = n$ , where  $n$  is an integer. Here we will compare a single estimate with  $W^*$  wells with the mean of  $n$  estimates that each use  $W'$  wells. Thus, for Fig Kd, each point for  $W = 500$  is a single estimate, where each point for  $W = 5$ ,  $W = 10$ ,  $W = 50$ , and  $W = 100$  is the mean of 100, 50, 10, and 5 estimates, respectively. With these comparisons in mind, we see two slight effects of different partitioning patterns. First, the variance is a bit higher for the single estimate coming from the largest number of wells. We attribute this shift to the fact that other quantities involved in the estimate (e.g., density of donors and recipients) are only being computed once for each point for  $W = 500$  in Fig Kd, whereas these quantities are being computed multiple times for smaller  $W$  values, such that anomalous values would tend to get muted as the estimates were averaged. The second effect is a more notable one. We see that as the number of wells per estimate goes down, slight inaccuracies in the estimate start to occur. Why does this happen?

To answer this question, let us consider the LDM estimate:

$$\gamma_D = -\ln p_0(\tilde{t}) \left( \frac{\psi_D + \psi_R}{D_0 R_0 (e^{(\psi_D + \psi_R)\tilde{t}} - 1)} \right)$$

The main thing that will be affected by the number of populations is  $p_0(\tilde{t})$ . Specifically, as  $W$  decreases, the variance in the fraction of populations without transconjugants increases. Suppose that we have  $n$  LDM estimates under consideration, and for each one a value  $\hat{p}_0(\tilde{t})$  is needed. Here we define:

$$\overline{\hat{p}_0(\tilde{t})} = \frac{\sum_{i=1}^n \hat{p}_{0,i}(\tilde{t})}{n},$$

where  $\hat{p}_{0,i}(\tilde{t})$  is the fraction of populations without transconjugants for the  $i^{\text{th}}$  estimate. Now, by Jensen's inequality, we have:

$$-\ln \left\{ \frac{\sum_{i=1}^n \hat{p}_{0,i}(\tilde{t})}{n} \right\} \left( \frac{\psi_D + \psi_R}{D_0 R_0 (e^{(\psi_D + \psi_R)\tilde{t}} - 1)} \right) < \frac{1}{n} \sum_{i=1}^n -\ln \hat{p}_{0,i}(\tilde{t}) \left( \frac{\psi_D + \psi_R}{D_0 R_0 (e^{(\psi_D + \psi_R)\tilde{t}} - 1)} \right)$$

$$-\ln \overline{\hat{p}_0(\tilde{t})} \left( \frac{\psi_D + \psi_R}{D_0 R_0 (e^{(\psi_D + \psi_R)\tilde{t}} - 1)} \right) < \frac{1}{n} \sum_{i=1}^n -\ln \hat{p}_{0,i}(\tilde{t}) \left( \frac{\psi_D + \psi_R}{D_0 R_0 (e^{(\psi_D + \psi_R)\tilde{t}} - 1)} \right)$$

As  $W$  gets large, the value  $\hat{p}_0(\tilde{t})$  is close to  $\overline{\hat{p}_0(\tilde{t})}$  for smaller  $W$  values. Thus, using the terminology from above:

$$\gamma_D[W^*] < \frac{1}{n} \sum_{i=1}^n \gamma_D[W'_i],$$

where  $\gamma_D[W^*]$  is the conjugation rate for the largest number of wells ( $W^*$ ), and  $\gamma_D[W'_i]$  is the conjugation rate for the  $i^{\text{th}}$  assay using a smaller number of wells ( $W'$ ). Thus, we see that as we partition wells into smaller numbers per estimate, the mean estimate will rise, which is what we see in Fig Kd. Consequently, we recommend a reasonably large number

1122  
1123

of wells in the LDM assay. A number between 50 and 100 appears sufficient to avoid inaccuracy and is also convenient when using a microtiter plate format for populations.

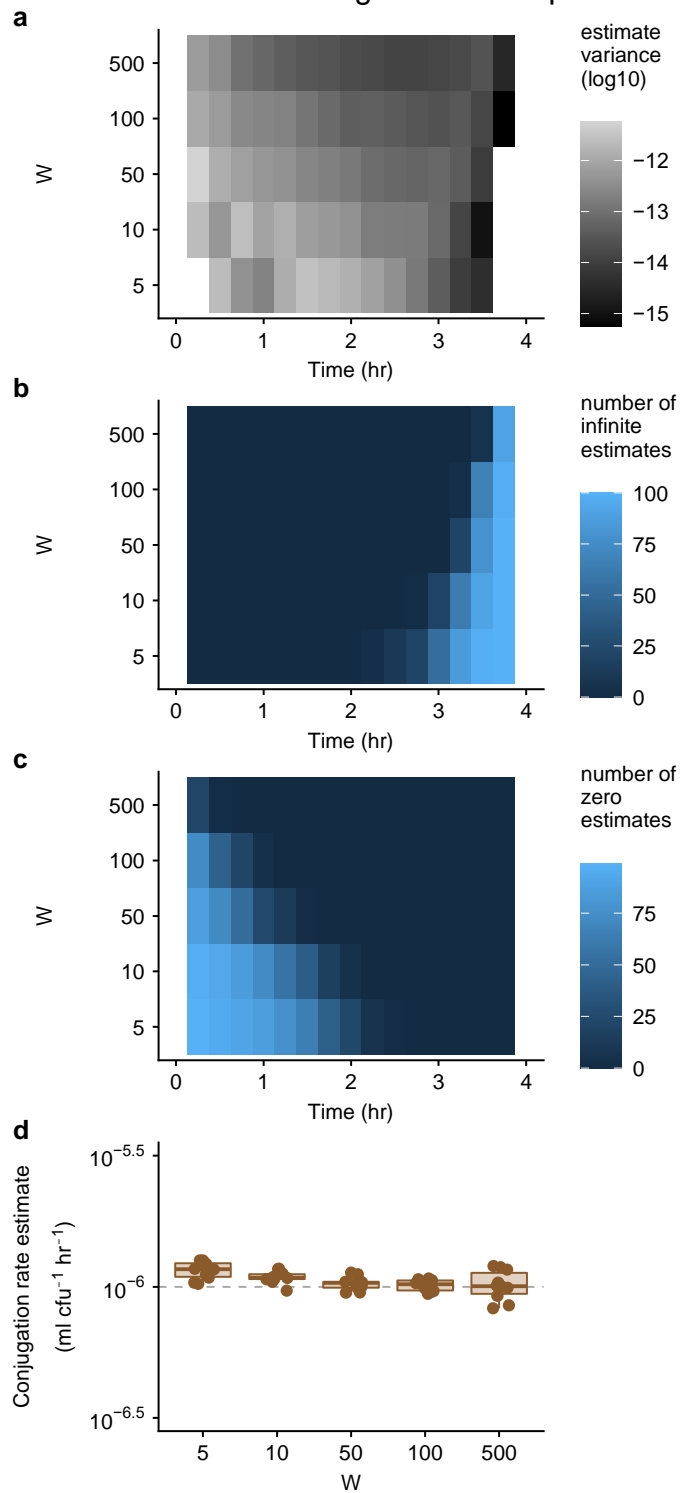

1124  
1125  
1126  
1127  
1128  
1129  
1130

**Fig K: The variance of LDM estimates using stochastic simulation.** Different number of populations ( $W$ ) are used for the LDM estimates, as indicated. The parameters used here are the same baseline parameters in Fig A which were  $\psi_D = \psi_R = \psi_T = 1$ , and  $\gamma_D = \gamma_T = 10^{-6}$ . The dynamic variables were initialized with  $D_0 = R_0 = 10^2$  and  $T_0 = 0$ . (a) The variance among the 100 estimates is given at 15-minute intervals where more than 1 out of the 100 calculated estimates produced a finite non-zero value. We ignore infinite estimates in the calculation of the variance. (b) The number of estimates with an

infinite value out of the 100 calculated. (c) The number of estimates with a zero value out of the 100 calculated. (d) A total of 500 populations is partitioned in different ways—split into 100 groups of 5 populations ( $W=5$ ), 50 groups of 10 populations ( $W=10$ ), 10 groups of 50 populations ( $W=50$ ), 5 groups of 100 populations ( $W=100$ ), or a single group of 500 populations ( $W=500$ ). Each plotted point is the mean conjugation rate of the rates calculated for each group (where the number of populations within each group vary as indicated by the  $W$  value) at a specific incubation time ( $\bar{t} = 2.35$ ) selected using the criteria described in the Materials and Methods. We ran the partitioning analysis 10 times using a new set of 500 populations. The data and code needed to generate this figure can be found at <https://github.com/livkosterlitz/LDM> or <https://doi.org/10.5281/zenodo.6677158>.

## Section 9 : Random effects on estimate accuracy and precision

In this section we explore, through simulation, some of the consequences of other random effects on the LDM and SIM estimates. Some of these effects are a consequence of experimental protocols. For instance, both approaches require dilution and plating in the laboratory to estimate donor and recipient density (and the SIM approach also uses dilution and plating to estimate transconjugant density). Because dilution and plating are subject to random sampling effects, there will be density-estimation errors introduced by these procedures. Other random effects are features of the cells under study. As we describe in Section 6d and 7, there can be a non-zero probability that any cell will fail to establish a lineage. For instance, a donor cell may fail to form a colony on a plate after incubation on selective medium, or a lone transconjugant cell in a well may fail to yield a turbid culture after incubation in selective medium. Again, there will be stochasticity in the number of cell lineages that go extinct, which will lead to error in calculating key quantities needed for the estimates (even with corrections). Here we explore the consequences of some of these random effects.

*Random effects in dilution, plating, and failure to form colonies:* We ran our stochastic simulations as before (Section 4), but instead of using the simulated numbers of cells directly for our estimates, we wrote a dilution-plating subroutine to simulate how cell density would be gauged in the lab. Suppose that a cell population has an actual density of  $N_0$  cells/mL. A 10-fold dilution series is generated recursively by diluting 100 $\mu$ L into 900 $\mu$ L. Thus, the density of cells in the first dilution is:

$$N_{-1} = rv[\text{Poisson}(0.1N_0)]$$

where  $rv[d]$  is a random value for a variable with a distribution given by  $d$ . The density of cells in the second dilution is:

$$N_{-2} = rv[\text{Poisson}(0.1N_{-1})].$$

More generally, the  $i^{\text{th}}$  dilution has density:

$$N_{-i} = rv[\text{Poisson}(0.1N_{-(i-1)})]$$

Now 100 $\mu$ L of each dilution in the entire series is plated, where the number of bacterial cells from the  $i^{\text{th}}$  dilution landing on the plate is:

$$B_{-i} = rv[\text{Poisson}(0.1N_{-i})]$$

1181  
1182 Finally, the number of colonies forming (given an extinction probability of  $\pi$ ) on the  $i^{\text{th}}$   
1183 dilution plate is:

$$1184 \quad C_{-i} = rv[\text{Binomial}(B_{-i}, 1 - \pi)]$$

1185  
1186  
1187 We pick the dilution plate with the maximum number of colonies in the range between 30  
1188 and 300. If every dilution plate is below 30 colonies, we simply use the plate with the  
1189 maximum number of colonies. For generality, let's suppose we select the  $i^{\text{th}}$  dilution plate.  
1190 We compute the cell density of the undiluted culture as:

$$1191 \quad N_{\text{est}} = \frac{C_{-i}}{1 - \pi} \times 10^{i+1} \frac{\text{cells}}{\text{mL}}$$

1192  
1193  
1194 Given the random effects of dilution, plating, and cell lineage extinction, it is likely that  
1195  $N_{\text{est}}$  will deviate from the actual cell density  $N_0$ .

1196  
1197 For the SIM estimate, we use this procedure to generate the density of donors, recipients  
1198 and transconjugants that are used in the estimate. For the LDM estimate, we use this  
1199 procedure to generate the density of donors and recipients that are used in the estimate.  
1200 Also, if the extinction probability of transconjugants in the wells is non-zero, we must also  
1201 track a monoculture of transconjugants in order to estimate the transconjugant growth  
1202 rate needed for the LDM correction (equation [7.1]), and we use the above procedure to  
1203 estimate the transconjugant densities in these cases.

1204  
1205 *Random effects in wells with transconjugants:* However, we also need to calculate the  
1206 fraction of wells with transconjugant-selecting medium that are not turbid for the LDM  
1207 estimate. Here the actual simulated number of transconjugants in a given population at  
1208 the end of the assay is  $T_{\tilde{t}}$ . The number of lineages that do not go extinct is

$$1209 \quad L_{-i} = rv[\text{Binomial}(T_{\tilde{t}}, 1 - \pi)]$$

1210  
1211  
1212 If  $L_{-i} > 0$ , then the well is turbid, whereas if  $L_{-i} = 0$ , then the well is non-turbid. The  
1213 proportion of non-turbid wells out of a total of  $W$  wells ( $P_{\text{nt}}$ ) can then be calculated. If we  
1214 have this quantity and all the relevant cell densities, we can then use equation [7.2] to  
1215 calculate the corrected LDM estimate.

1216  
1217 *Results:* We show the results of adding these random effects in Fig L. Each rectangle  
1218 represents 100 estimates for a combination of the incubation time ( $\tilde{t}$ ) and an extinction  
1219 probability ( $\pi$ ), which, for simplicity, we assume is the same for all cell types both on plates  
1220 and in wells. For reference, estimates without the random effects of dilution, plating, and  
1221 extinction are given in the bottom row of each plot. Estimates with the random effects of  
1222 only dilution and plating can be found in the row with zero extinction probability in each  
1223 plot. We note that as the extinction probability increases, the end point of the assay must  
1224 also increase (to obtain sufficient colonies and turbid wells), thus, the range of incubation  
1225 times shift with this quantity.

1226  
1227 As random effects are added, both the LDM and SIM estimates of the donor conjugation  
1228 rate tend to deviate more from the actual value, but there is not systematic deviation (Fig  
1229 La). Not surprisingly, as random effects are added, the variance in estimates rises, but  
1230 this effect is more pronounced for the SIM estimate (Fig Lb). For both approaches, a zero



1231  
 1232  
 1233  
 1234

estimate is possible (when there are no transconjugant colonies or no turbid transconjugant wells) and for the LDM estimate an infinite estimate is possible (when all the transconjugant wells are turbid). However, we see these extreme values occur primarily at the boundaries of the time interval for incubation times (Fig Lc and Ld).

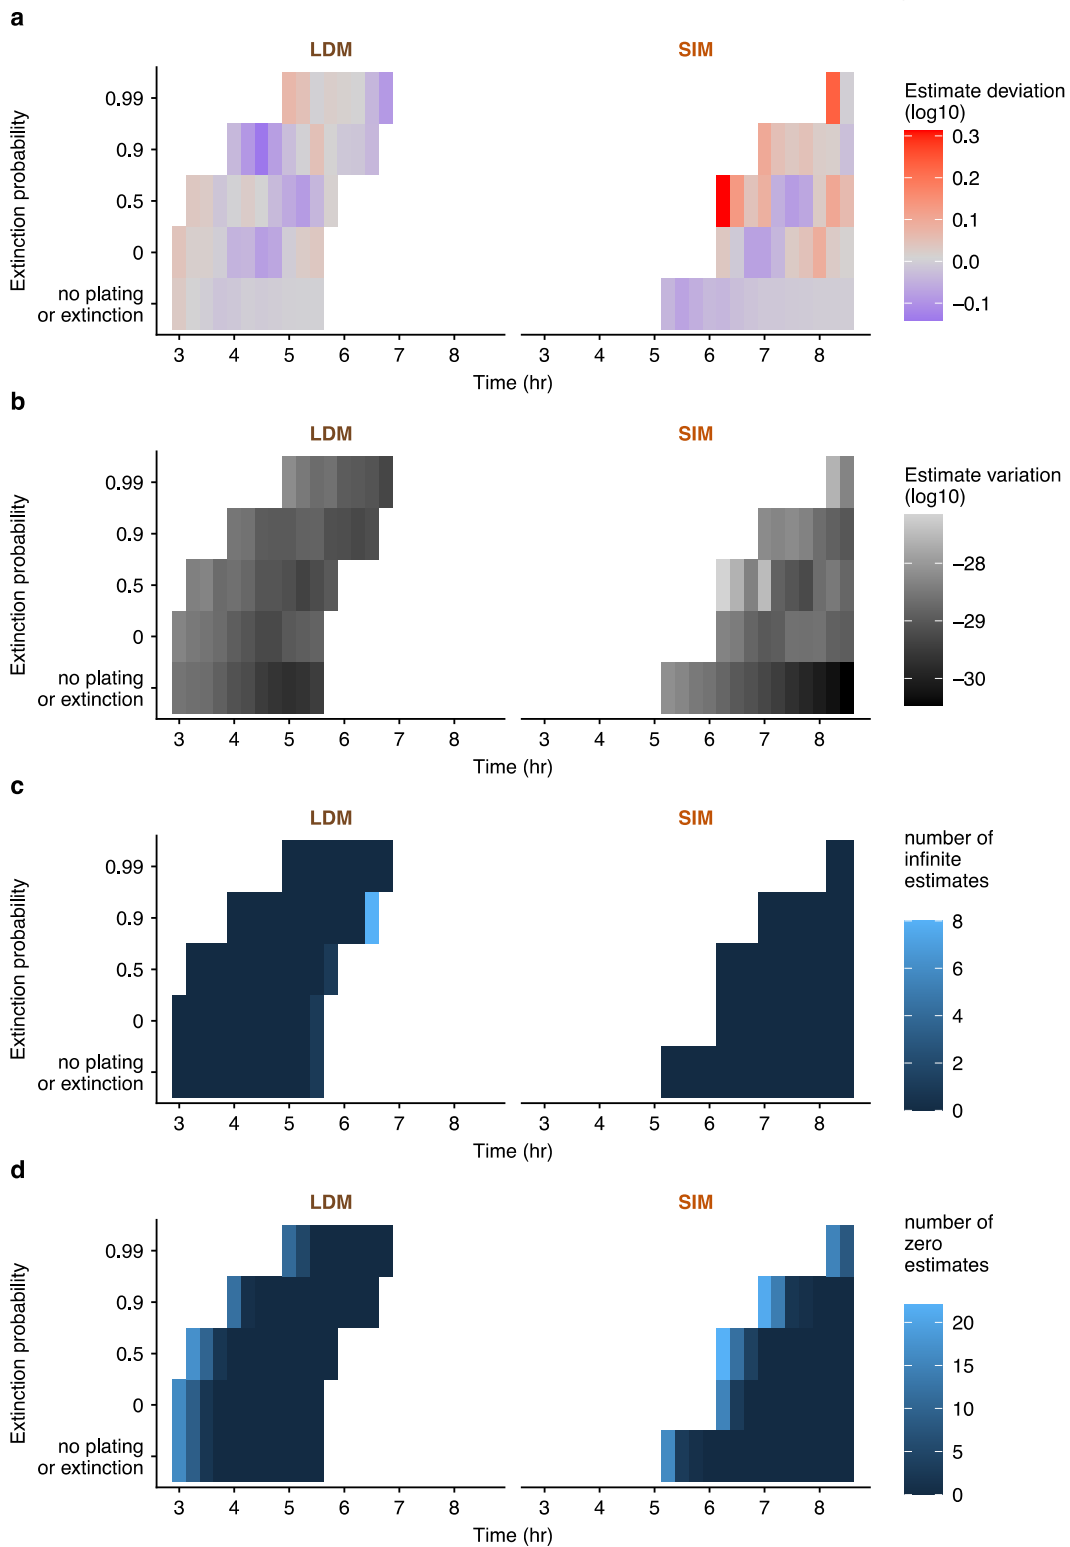

1235  
 1236  
 1237  
 1238

**Fig L : The random effects of dilution, plating, and failure to establish on the accuracy and variance of the LDM and SIM estimates.** Different extinction probabilities are used, as indicated. The parameter values and initial densities are the same as Fig Ea which were  $\psi_D = \psi_R = \psi_T = 1$  and  $\gamma_D = \gamma_T = 1 \times 10^{-14}$ . The dynamic variables were

1239 initialized with  $D_0 = R_0 = 10^5$  and  $T_0 = 0$ . The scenario with no dilution plating and a zero-  
1240 extinction probability (the bottom row in each panel) is the data from Fig Ea. The mean  
1241 deviation (a) and variation (b) of each set of estimates is given at 15-minute time intervals  
1242 where at least 75 out of the 100 calculate estimates produced a finite non-zero value. (c)  
1243 The number of infinite estimates out of the 100 calculated in the relevant intervals. (d)  
1244 The number of estimates with a zero value out of the 100 calculated in the relevant  
1245 intervals. We note that the Gillespie algorithm is computationally expensive when the  
1246 densities get very large. Therefore, due to the longer incubation times needed for the SIM,  
1247 only 100 populations of the 10,000 were simulated through the later time intervals until  
1248 on average a population density of  $1 \times 10^9$  is reached (i.e.,  $\tilde{t} = 8.5$  h). The remaining 9,900  
1249 populations, used to compute  $\hat{p}_0(\tilde{t})$  for the LDM, were run until an average of 100  
1250 transconjugants was reached (i.e.,  $\tilde{t} = 6.9$  h). This explains the truncation of the SIM  
1251 estimates at 8.5 hours and the LDM estimates 6.75 hours, which is most notable in the  
1252 scenario where the extinction probability is 0.99. The data and code needed to generate  
1253 this figure can be found at <https://github.com/livkosterlitz/LDM> or  
1254 <https://doi.org/10.5281/zenodo.6677158>.

## References

1. B. R. Levin, F. M. Stewart, V. A. Rice, The kinetics of conjugative plasmid transmission: fit of a simple mass action model. *Plasmid* **2**, 247–260 (1979).
2. X. Zhong, J. Droesch, R. Fox, E. M. Top, S. M. Krone, On the meaning and estimation of plasmid transfer rates for surface-associated and well-mixed bacterial populations. *J. Theor. Biol.* **294**, 144–152 (2012).
3. J. H. Bethke, *et al.*, Environmental and genetic determinants of plasmid mobility in pathogenic *Escherichia coli*. *Sci Adv* **6**, eaax3173 (2020).
4. A. J. Lopatkin, *et al.*, Antibiotics as a selective driver for conjugation dynamics. *Nat Microbiol* **1**, 16044 (2016).
5. L. Simonsen, D. M. Gordon, F. M. Stewart, B. R. Levin, Estimating the rate of plasmid transfer: an end-point method. *J. Gen. Microbiol.* **136**, 2319–2325 (1990).
6. T. A. Sysoeva, Y. Kim, J. Rodriguez, A. J. Lopatkin, L. You, Growth-stage-dependent regulation of conjugation. *AIChE J.* **66** (2020).
7. Huisman, J. S. *et al.* Estimating plasmid conjugation rates: A new computational tool and a critical comparison of methods. *Plasmid* **121**, 102627 (2022)
8. H. L. Jordt, “Of *E. coli* and classrooms: Stories of persistence.” (2019).
9. H. Jordt, *et al.*, Coevolution of host-plasmid pairs facilitates the emergence of novel multidrug resistance. *Nat Ecol Evol* **4**, 863–869 (2020).
10. H. K. Alexander, R. C. MacLean, Stochastic bacterial population dynamics restrict the establishment of antibiotic resistance from single cells. *Proc. Natl. Acad. Sci. U. S. A.* **117**, 19455–19464 (2020).
11. P. Keller, T. Antal, Mutant number distribution in an exponentially growing population. *J. Stat. Mech.* **2015**, P01011 (2015).
12. S. E. Luria, M. Delbrück, Mutations of Bacteria from Virus Sensitivity to Virus Resistance. *Genetics* **28**, 491–511 (1943).
